# Supplementary material for: Priority effects during fungal community establishment in beech wood
Source: PubMed Central journal article supplement (PMC4579477; doi:10.1038/ismej.2015.38), 2015-03-20
Supplement: ismej201538x1.pdf [file ismej201538x1.pdf]

|    | 1       | 2       | 3       | 4       | 5       | 6       | 7       | 8       | 9       | 10      |
|----|---------|---------|---------|---------|---------|---------|---------|---------|---------|---------|
| 1  | Ba      | Pv      | Control | Pi      | Hf      | Bxn     | Tv      | Vc      | Sh      | Hpf     |
| 2  | Hpf     | Tv      | Pi      | Control | Vc      | Sh      | Pv      | Hf      | Bxn     | Ba      |
| 3  | Hf      | Bxn     | Hpf     | Ba      | Tv      | Control | Sh      | Pv      | Pi      | Vc      |
| 4  | Pi      | Vc      | Bxn     | Sh      | Ba      | Pv      | Hf      | Hpf     | Tv      | Control |
| 5  | Sh      | Hpf     | Pv      | Tv      | Pi      | Vc      | Ba      | Control | Hf      | Bxn     |
| 6  | Vc      | Sh      | Ba      | Hpf     | Pv      | Pi      | Bxn     | Tv      | Control | Hf      |
| 7  | Control | Hf      | Sh      | Bxn     | Hpf     | Tv      | Vc      | Ba      | Pv      | Pi      |
| 8  | Tv      | Control | Vc      | Hf      | Sh      | Hpf     | Pi      | Bxn     | Ba      | Pv      |
| 9  | Pv      | Pi      | Hf      | Vc      | Bxn     | Ba      | Control | Sh      | Hpf     | Tv      |
| 10 | Bxn     | Ba      | Tv      | Pv      | Control | Hf      | Hpf     | Pi      | Vc      | Sh      |

← 2.5m →
