# Supplementary material for: Priority effects during fungal community establishment in beech wood
Source: PubMed Central journal article supplement (PMC4579477; doi:10.1038/ismej.2015.38), 2015-03-20

# Supplementary Figure 2A

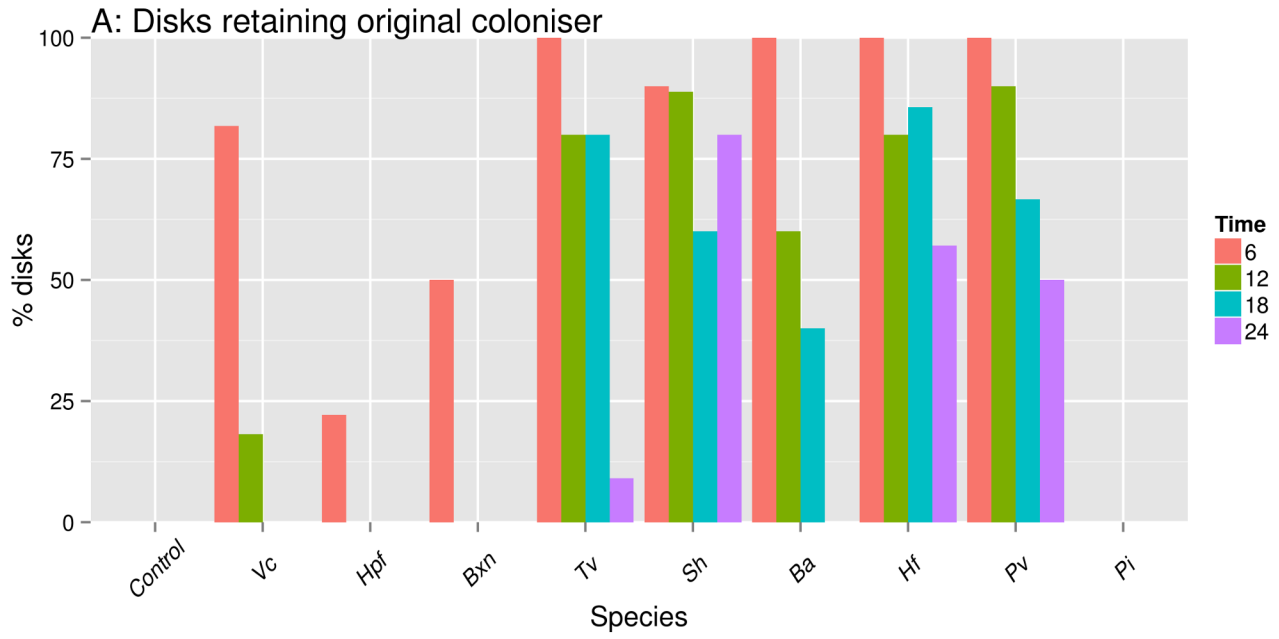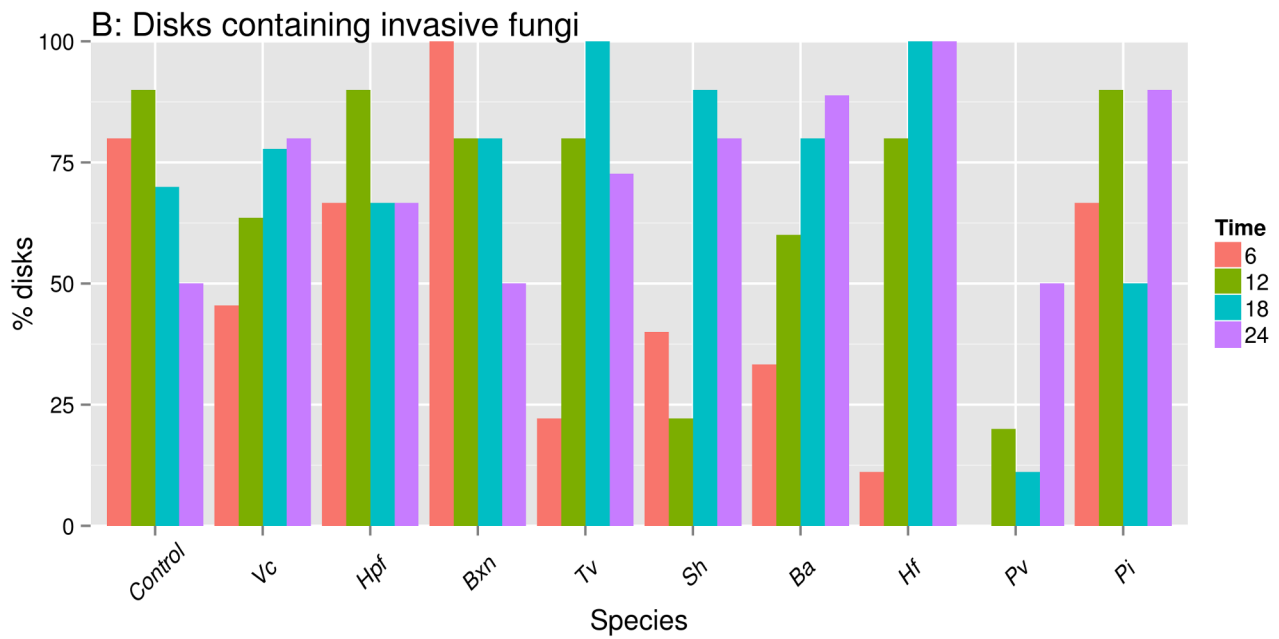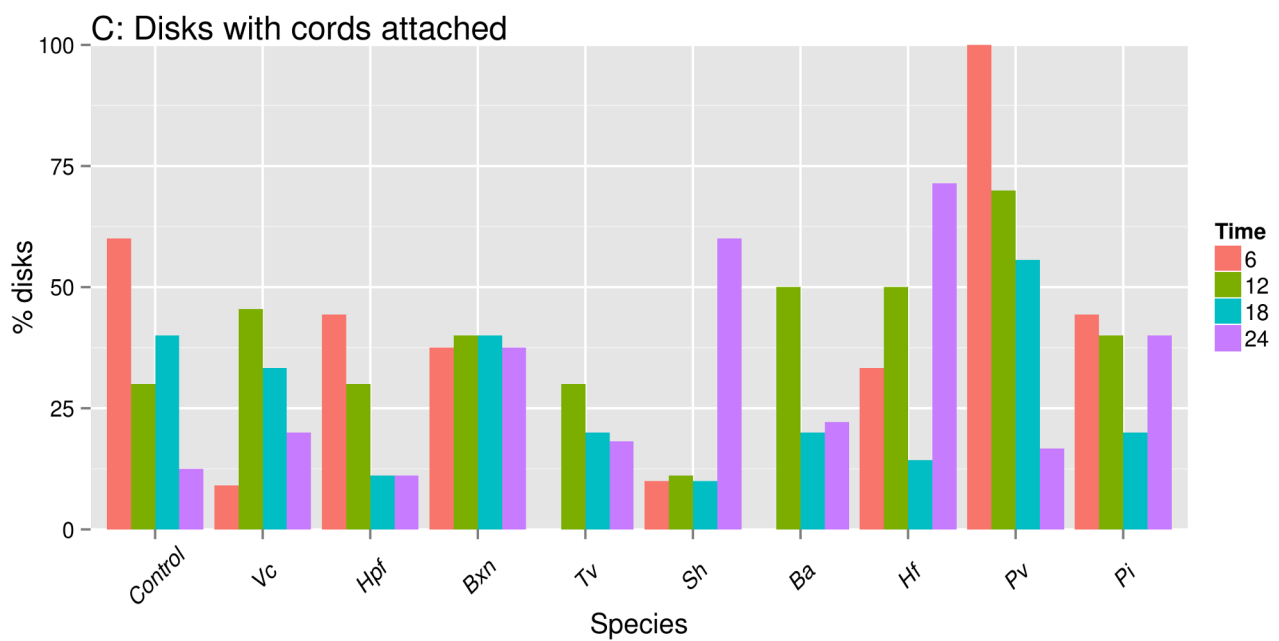

# Supplementary Figure 2B

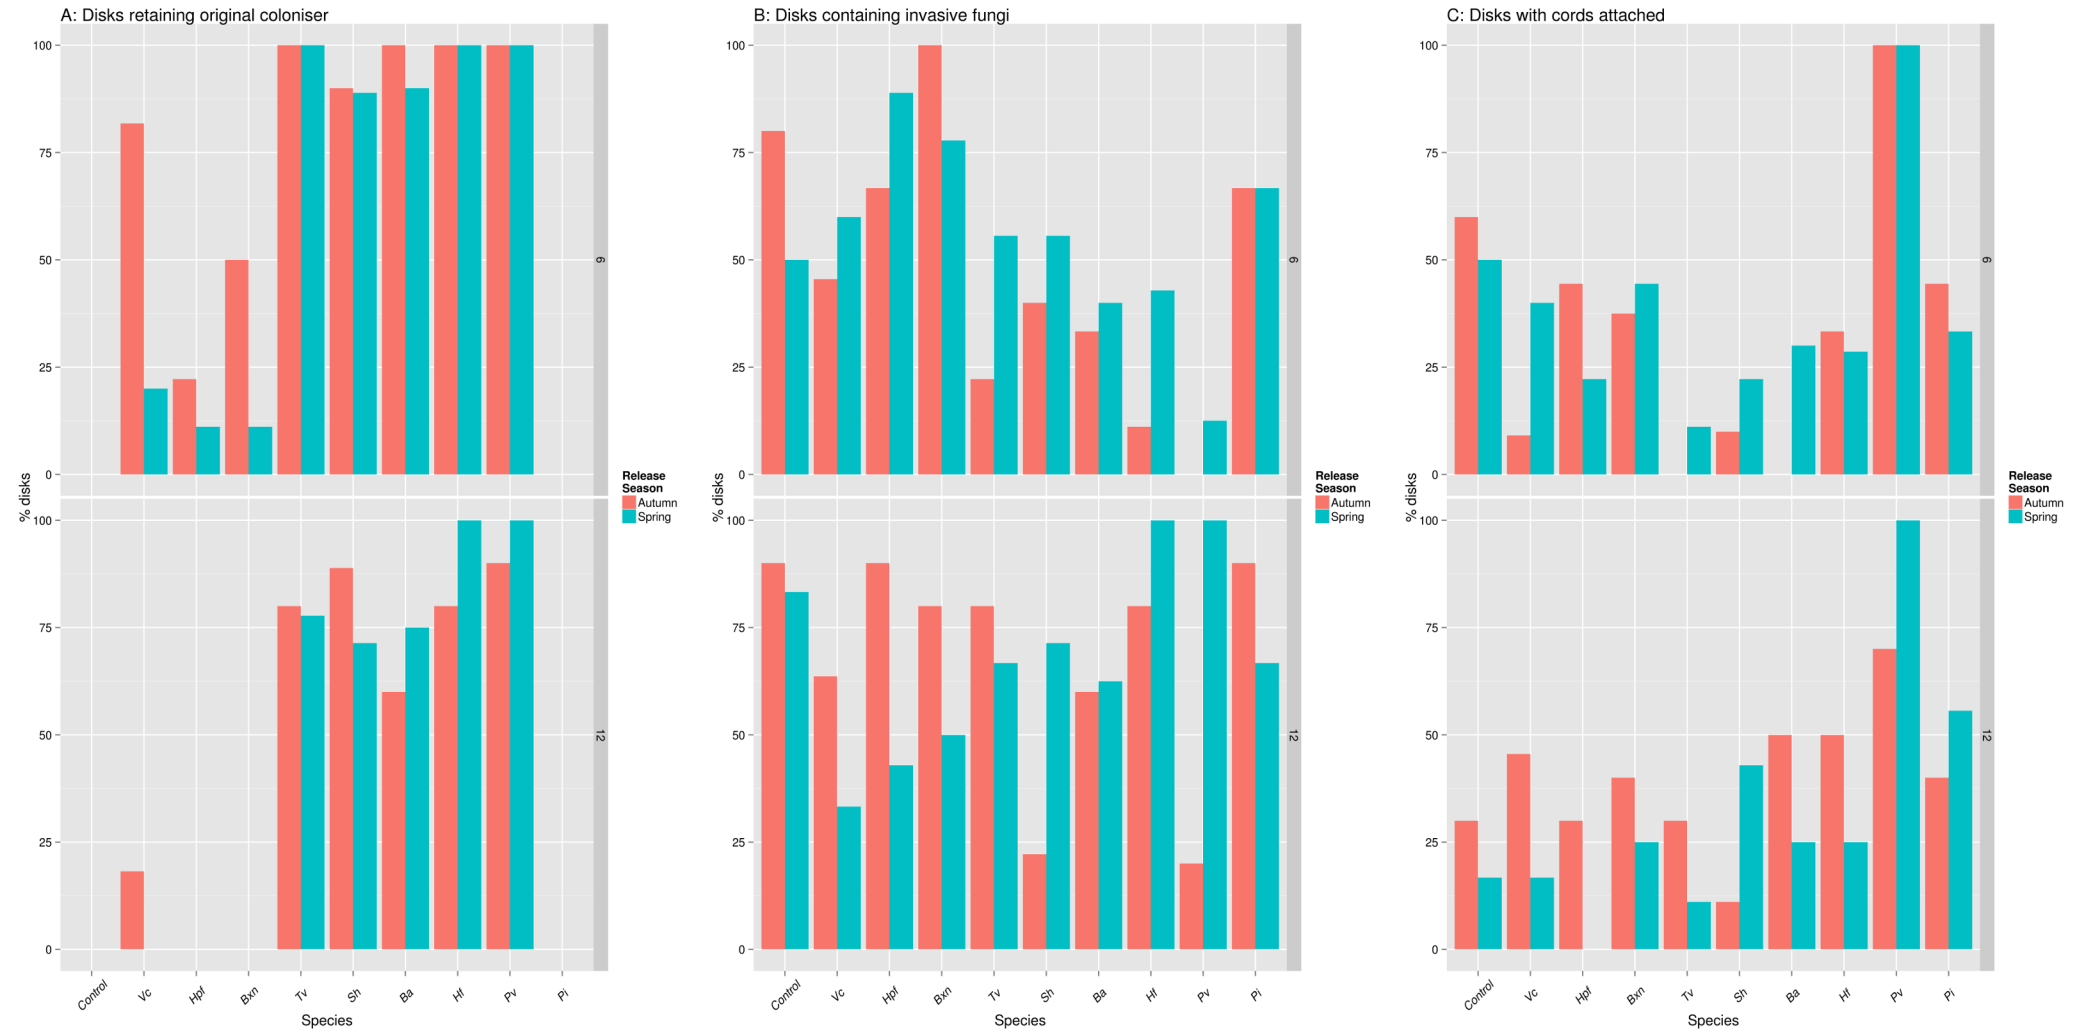

# Supplementary Figure 2C

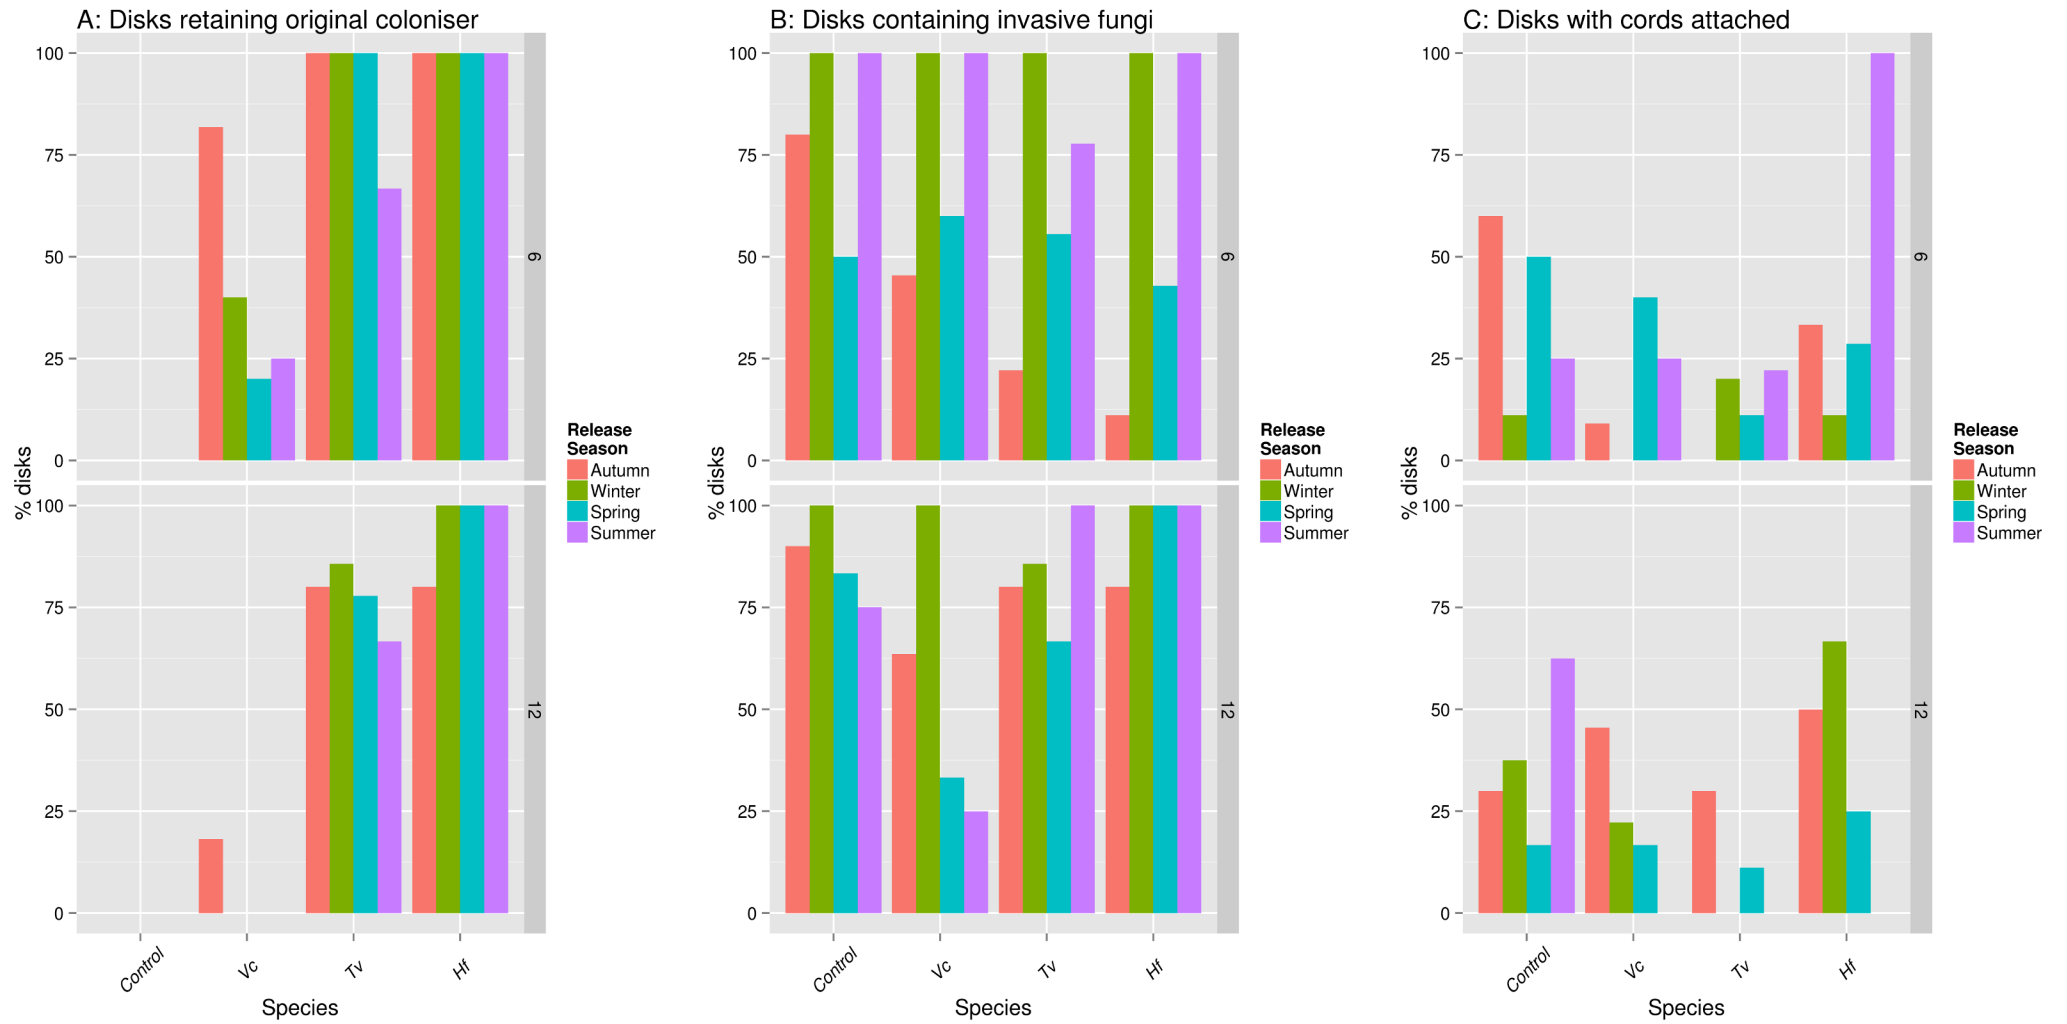

# Supplementary Figure 2D

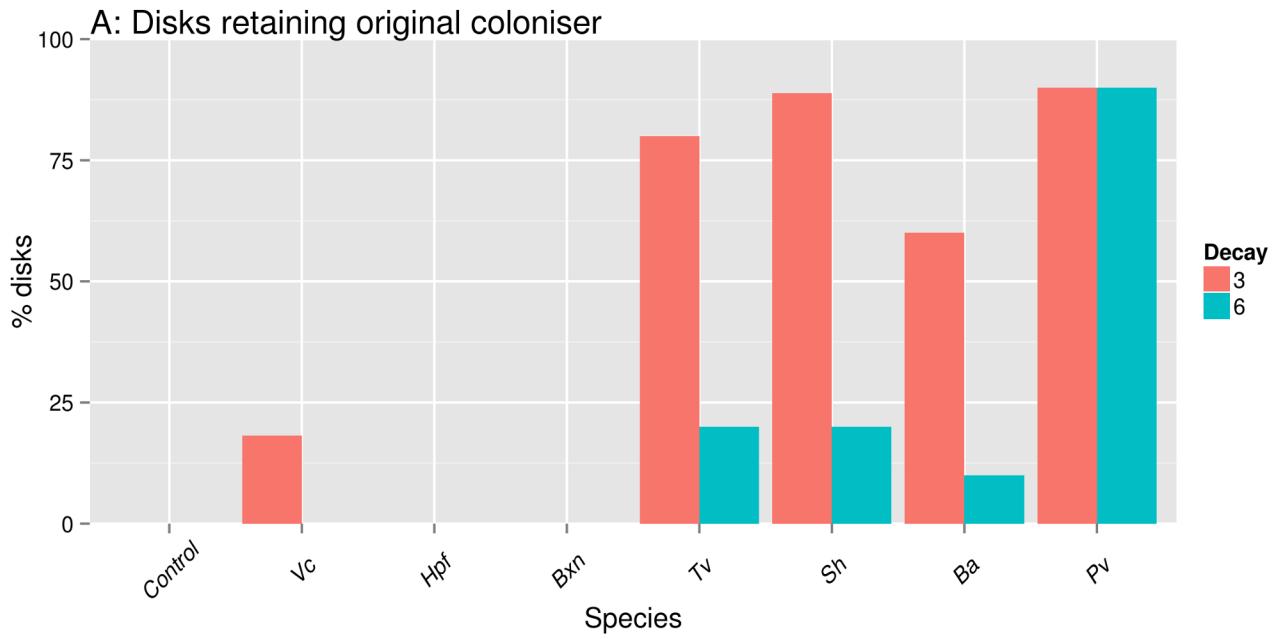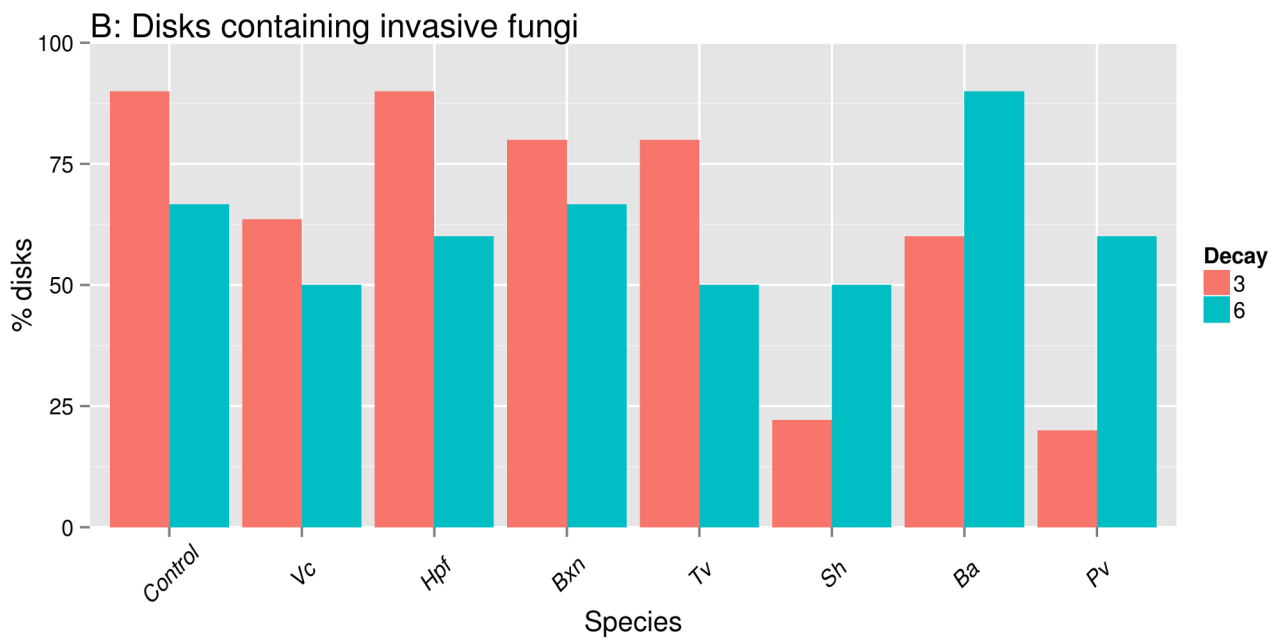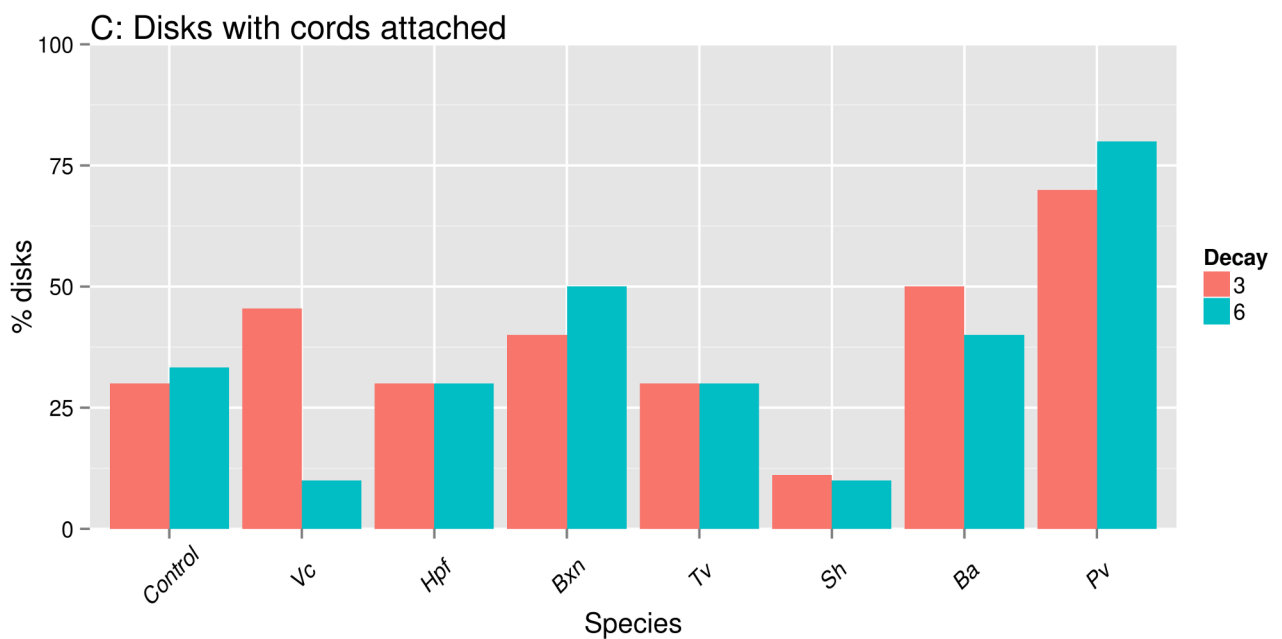

# Supplementary Figure 2E

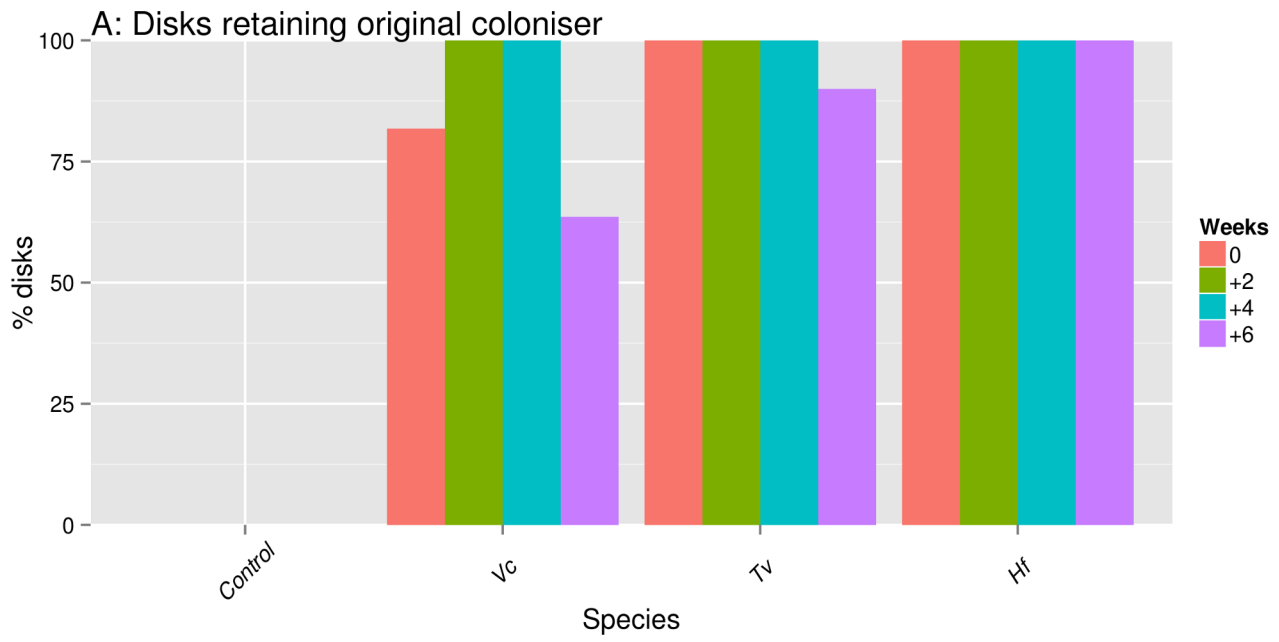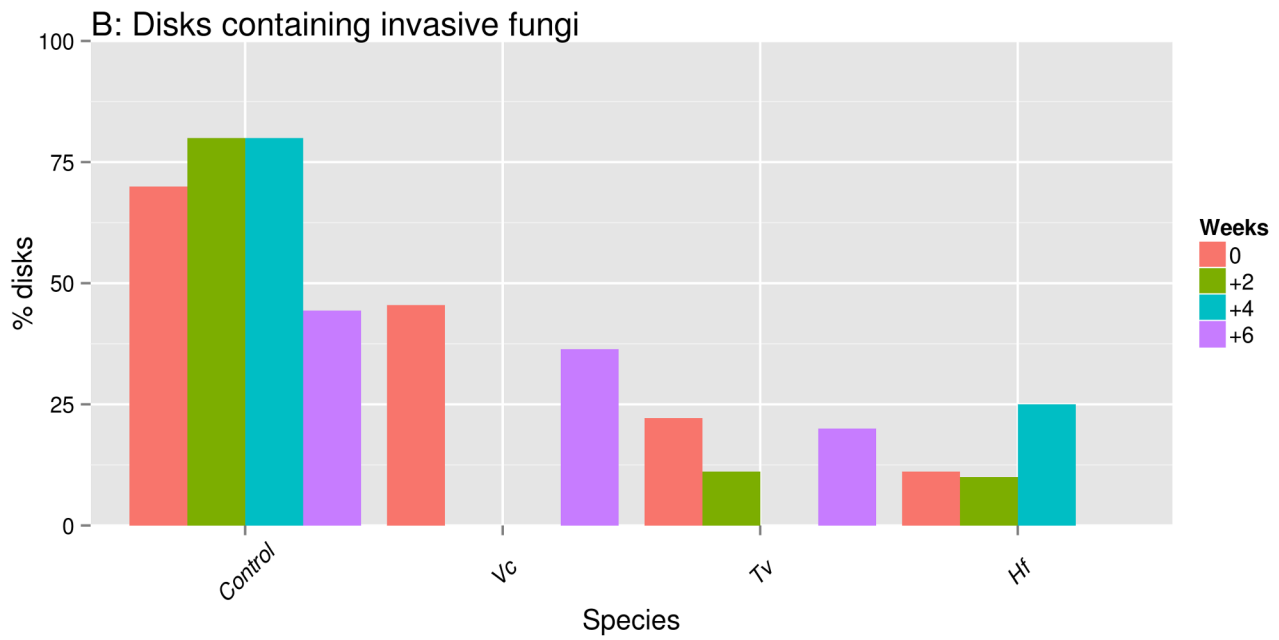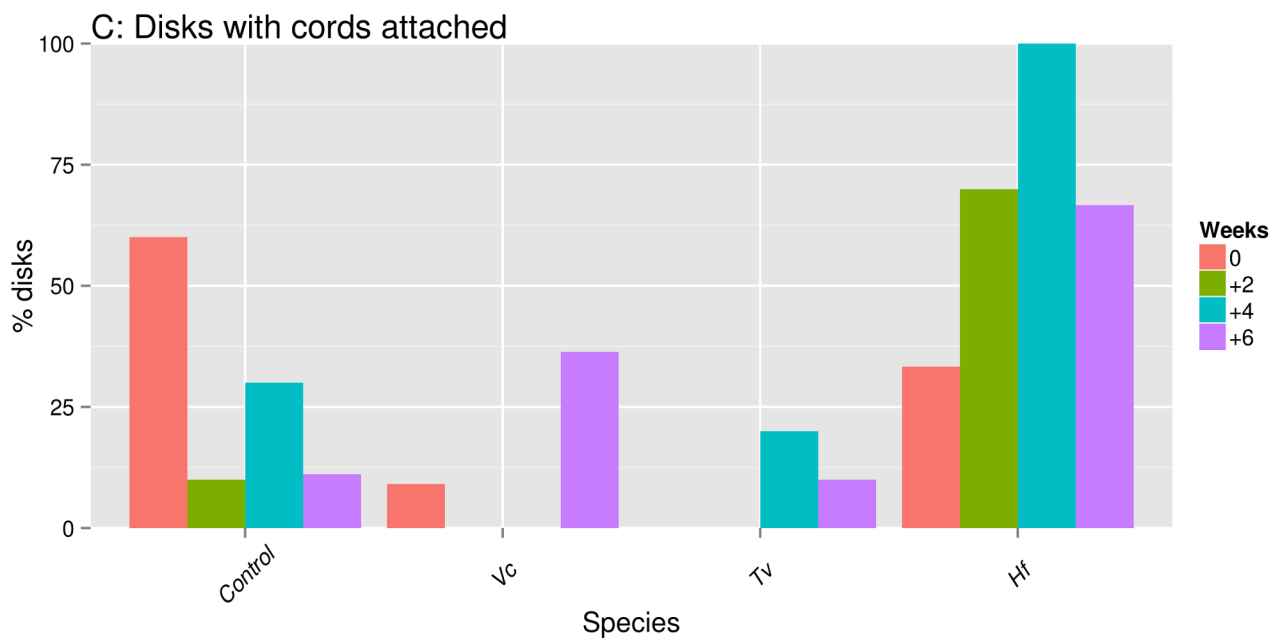

Supplement: ismej201538x2.pdf [file ismej201538x2.pdf]
