# Supplementary material for: Priority effects during fungal community establishment in beech wood
Source: PubMed Central journal article supplement (PMC4579477; doi:10.1038/ismej.2015.38), 2015-03-20
Supplement: ismej201538x7.pdf [file ismej201538x7.pdf]

**Supplementary Table 3. Occurrence and identification of OTUs by precoloniser species.** Each OTU is given as a % of the total OTUs detected across all replicates of each precoloniser species. The sum occurrence across all precoloniser species gives a measure of the overall abundance of each OTU. OTU identity was determined using massBLASTer, and the taxon with the best e-value was selected, and the relevant accession number is given. Taxonomy was determined by Galaxy454. -, not detected or data unavailable. OTUs were divided into one of two groups based on their ecological role: those that are known to directly contribute to wood decomposition were assigned to the decomposer group (D), whereas those that are secondary saprotrophs (live off exudates or the mycelium of wood decomposers) assigned to the co-coloniser group (C). Broadly, the Ascomycota were group C and the Basidiomycota group D.

| OTU ID no.               | Occurrence as % of total sequences occurring in each precoloniser species |                   |                      |                      |                      |                    |                  |                       | Average occurrence | Identification details           |             | Taxonomy |               |           |                 | Functional group |
|--------------------------|---------------------------------------------------------------------------|-------------------|----------------------|----------------------|----------------------|--------------------|------------------|-----------------------|--------------------|----------------------------------|-------------|----------|---------------|-----------|-----------------|------------------|
|                          | Control                                                                   | <i>V.comedens</i> | <i>H. fragiforme</i> | <i>B. nummularia</i> | <i>T. versicolor</i> | <i>S. hirsutum</i> | <i>B. adusta</i> | <i>H. fasciculare</i> |                    | Taxon name                       | Accession # | E-value  | Phylum        | Subphylum | Class           |                  |
| priority_effects_CL_4    | 4.44                                                                      | 12.93             | 10.39                | 0.06                 | 16.31                | 3.23               | 19.67            | 52.42                 | 14.93              | <i>Xenamatella vaga</i>          | UDB000519   | 2E-131   | Basidiomycota | n         | Agaricomycetes  | D                |
| priority_effects_CL_9    | 8.94                                                                      | 11.29             | 4.21                 | 12.18                | -                    | 12.36              | 0.08             | -                     | 8.18               | <i>Coprinellus impatiens</i>     | JN943130    | 1e-153   | Basidiomycota | n         | Agaricomycetes  | D                |
| priority_effects_CL_13   | -                                                                         | 10.28             | -                    | -                    | -                    | -                  | 3.11             | 0.22                  | 4.54               | <i>Phanerochaete sp.</i>         | UDB017837   | 1E-153   | Basidiomycota | n         | n               | D                |
| priority_effects_CL_34   | 7.73                                                                      | -                 | -                    | 0.18                 | -                    | -                  | -                | -                     | 3.95               | <i>Mycena galopus</i>            | JQ926166    | 2E-156   | Basidiomycota | n         | Agaricomycetes  | D                |
| priority_effects_CL_39   | -                                                                         | -                 | -                    | 3.88                 | -                    | -                  | -                | -                     | 3.88               | uncultured Basidiomycete         | KF297103    | 7e-120   | Basidiomycota | n         | Agaricomycetes  | D                |
| priority_effects_CL_15   | 0.06                                                                      | -                 | 1.44                 | 12.79                | -                    | -                  | 0.00             | -                     | 3.57               | <i>Coprinopsis lagopus</i>       | HM126487    | 2e-146   | Basidiomycota | n         | Agaricomycetes  | D                |
| priority_effects_CL_48   | -                                                                         | -                 | 0.06                 | 12.00                | -                    | 0.14               | 0.16             | -                     | 3.09               | <i>Coprinopsis marcescibilis</i> | DQ389728    | 1e-143   | Basidiomycota | n         | Agaricomycetes  | D                |
| priority_effects_CL_58   | -                                                                         | 0.06              | 8.89                 | 0.42                 | -                    | -                  | 0.08             | -                     | 2.36               | uncultured Agaricaceae           | AM076653    | 6e-141   | Basidiomycota | n         | Agaricomycetes  | D                |
| priority_effects_CL_5    | -                                                                         | -                 | 0.06                 | -                    | 0.22                 | -                  | 0.08             | 8.81                  | 2.29               | <i>Stereum hirsutum</i>          | UDB017896   | 7E-155   | Basidiomycota | n         | n               | D                |
| priority_effects_CL_41   | 6.02                                                                      | -                 | -                    | 0.06                 | -                    | 0.14               | 0.16             | -                     | 1.59               | <i>Parasola conopilus</i>        | UDB011851   | 4E-152   | Basidiomycota | n         | Agaricomycetes  | D                |
| priority_effects_CL_18   | 0.43                                                                      | 0.13              | 4.62                 | 0.48                 | 1.24                 | -                  | -                | -                     | 1.38               | <i>Tubaria furfuracea</i>        | UDB011741   | 2E-156   | Basidiomycota | n         | Agaricomycetes  | D                |
| priority_effects_CL_200  | -                                                                         | -                 | 1.21                 | -                    | -                    | -                  | -                | -                     | 1.21               | <i>Psathyrella prona</i>         | FN396141    | 2e-145   | Basidiomycota | n         | Agaricomycetes  | D                |
| priority_effects_CL_1903 | -                                                                         | -                 | -                    | -                    | -                    | -                  | -                | 0.88                  | 0.88               | <i>Hypholoma fasciculare</i>     | JQ685719    | 1e-58    | Basidiomycota | n         | Agaricomycetes  | D                |
| priority_effects_CL_23   | 1.70                                                                      | 0.06              | 2.37                 | 0.06                 | -                    | -                  | 0.08             | -                     | 0.85               | uncultured Basidiomycete         | KF297213    | 2e-94    | Basidiomycota | n         | Agaricomycetes  | D                |
| priority_effects_CL_136  | -                                                                         | -                 | -                    | -                    | -                    | -                  | 0.62             | -                     | 0.62               | <i>Lecythophora sp olrim15</i>   | AY789083    | 2e-124   | Basidiomycota | n         | Dacrymycetes    | D                |
| priority_effects_CL_44   | 1.95                                                                      | -                 | 0.06                 | 0.18                 | -                    | -                  | 0.16             | -                     | 0.59               | <i>Phlebia uda</i>               | AF141614    | 7e-150   | Basidiomycota | n         | Agaricomycetes  | D                |
| priority_effects_CL_53   | 1.46                                                                      | -                 | -                    | 0.06                 | 0.11                 | -                  | -                | -                     | 0.54               | <i>Mycena sp MCVE997</i>         | JF908495    | 8e-160   | Basidiomycota | n         | Agaricomycetes  | D                |
| priority_effects_CL_65   | -                                                                         | -                 | 0.35                 | -                    | -                    | -                  | -                | -                     | 0.35               | <i>Parasola schroeterii</i>      | JN943136    | 2E-146   | Basidiomycota | n         | Agaricomycetes  | D                |
| priority_effects_CL_185  | -                                                                         | -                 | -                    | -                    | -                    | -                  | 0.39             | 0.22                  | 0.30               | <i>Calocera cornea</i>           | AY789083    | 2e-114   | Basidiomycota | n         | Dacrymycetes    | D                |
| priority_effects_CL_6    | 0.06                                                                      | 0.50              | -                    | 0.06                 | 0.34                 | 0.56               | -                | 0.22                  | 0.29               | <i>Bjerkandera adusta</i>        | JX082339    | 2e-146   | Basidiomycota | n         | Agaricomycetes  | D                |
| priority_effects_CL_273  | -                                                                         | -                 | -                    | -                    | -                    | 0.28               | -                | -                     | 0.28               | <i>Massarina sp JP2013</i>       | JX981477    | 5e-126   | Basidiomycota | n         | Tremellomycetes | D                |
| priority_effects_CL_324  | -                                                                         | -                 | -                    | -                    | -                    | 0.28               | -                | -                     | 0.28               | <i>Tremella foliacea</i>         | UDB018809   | 6E-130   | Basidiomycota | n         | Agaricomycetes  | D                |
| priority_effects_CL_94   | -                                                                         | -                 | -                    | -                    | 0.11                 | 0.42               | -                | -                     | 0.27               | <i>Dacrymyces minor</i>          | AB712458    | 9e-54    | Basidiomycota | n         | Dacrymycetes    | D                |
| priority_effects_CL_124  | 0.24                                                                      | -                 | -                    | -                    | -                    | -                  | -                | -                     | 0.24               | <i>Sistotrema sp quinchoo</i>    | KC514823    | 8e-110   | Basidiomycota | n         | n               | D                |
| priority_effects_CL_341  | 0.24                                                                      | -                 | -                    | -                    | -                    | -                  | -                | -                     | 0.24               | <i>Coprinellus callinus</i>      | JN159518    | 1e-153   | Basidiomycota | n         | Agaricomycetes  | D                |
| priority_effects_CL_2601 | 0.24                                                                      | -                 | -                    | -                    | -                    | -                  | -                | -                     | 0.24               | unknown Agaricomycete            | UDB018605   | 4e-127   | Basidiomycota | n         | Agaricomycetes  | D                |
| priority_effects_CL_144  | -                                                                         | -                 | -                    | 0.24                 | -                    | -                  | -                | -                     | 0.24               | <i>Psathyrella microrrhiza</i>   | FN396130    | 7e-155   | Basidiomycota | n         | Agaricomycetes  | D                |
| priority_effects_CL_10   | 0.12                                                                      | 0.13              | -                    | 0.06                 | -                    | 0.14               | 0.54             | 0.44                  | 0.24               | <i>Trametes versicolor</i>       | UDB011614   | 3E-149   | Basidiomycota | n         | Agaricomycetes  | D                |
| priority_effects_CL_1881 | -                                                                         | -                 | -                    | -                    | 0.22                 | -                  | -                | -                     | 0.22               | uncultured Polyporales           | FJ820656    | 5e-69    | Basidiomycota | n         | n               | D                |
| priority_effects_CL_59   | 0.49                                                                      | -                 | 0.17                 | 0.12                 | -                    | -                  | 0.08             | -                     | 0.21               | uncultured Basidiomycete         | AB370328    | 5e-107   | Basidiomycota | n         | n               | D                |
| priority_effects_CL_99   | 0.18                                                                      | -                 | -                    | -                    | -                    | -                  | -                | -                     | 0.18               | uncultured Basidiomycete         | DQ309168    | 6e-151   | Basidiomycota | n         | n               | D                |
| priority_effects_CL_259  | -                                                                         | -                 | -                    | -                    | -                    | 0.14               | -                | 0.22                  | 0.18               | <i>Dacrymyces minor</i>          | AB712458    | 7e-45    | Basidiomycota | n         | Dacrymycetes    | D                |
| priority_effects_CL_123  | -                                                                         | 0.06              | -                    | -                    | -                    | 0.28               | -                | -                     | 0.17               | uncultured Agaricomycete         | HQ211619    | 3e-113   | Basidiomycota | n         | n               | D                |
| priority_effects_CL_190  | -                                                                         | 0.06              | -                    | -                    | -                    | 0.28               | -                | -                     | 0.17               | <i>Dacrymyces minor</i>          | AB712458    | 9e-49    | Basidiomycota | n         | Dacrymycetes    | D                |
| priority_effects_CL_64   | 0.06                                                                      | 0.32              | -                    | -                    | 0.11                 | 0.14               | -                | 0.22                  | 0.17               | <i>Trametes palisotii</i>        | EU661873    | 3e-59    | Basidiomycota | n         | Agaricomycetes  | D                |
| priority_effects_CL_181  | -                                                                         | -                 | -                    | -                    | -                    | -                  | 0.16             | -                     | 0.16               | Stephanosporaceae                | UDB014037   | 4e-133   | Basidiomycota | n         | Tremellomycetes | D                |
| priority_effects_CL_103  | 0.18                                                                      | -                 | 0.12                 | -                    | -                    | -                  | -                | -                     | 0.15               | unknown Basidiomycete            | KF673759    | 2e-125   | Basidiomycota | n         | Agaricomycetes  | D                |
| priority_effects_CL_110  | -                                                                         | -                 | -                    | -                    | 0.22                 | 0.14               | 0.08             | -                     | 0.15               | <i>Dacrymyces subarcticus</i>    | AB712467    | 4e-77    | Basidiomycota | n         | Dacrymycetes    | D                |
| priority_effects_CL_156  | -                                                                         | 0.13              | -                    | -                    | -                    | -                  | -                | -                     | 0.13               | uncultured Basidiomycete         | DQ309168    | 1e-142   | Basidiomycota | n         | n               | D                |
| priority_effects_CL_86   | 0.12                                                                      | -                 | -                    | -                    | -                    | -                  | -                | -                     | 0.12               | uncultured Basidiomycete         | AB370321    | 5e-112   | Basidiomycota | n         | n               | D                |
| priority_effects_CL_143  | 0.12                                                                      | -                 | -                    | -                    | -                    | -                  | -                | -                     | 0.12               | uncultured Basidiomycete         | KF385280    | 4E-132   | Basidiomycota | n         | Agaricomycetes  | D                |
| priority_effects_CL_77   | -                                                                         | -                 | 0.12                 | -                    | -                    | -                  | -                | -                     | 0.12               | uncultured Basidiomycete         | HQ154321    | 2e-150   | Basidiomycota | n         | Agaricomycetes  | D                |
| priority_effects_CL_2419 | -                                                                         | -                 | 0.12                 | -                    | -                    | -                  | -                | -                     | 0.12               | unknown Agaricomycete            | UDB018605   | 1e-98    | Basidiomycota | n         | Agaricomycetes  | D                |
| priority_effects_CL_22   | -                                                                         | -                 | 0.06                 | 0.06                 | 0.11                 | -                  | -                | 0.22                  | 0.11               | <i>Vuilleminia comedens</i>      | HM046892    | 3E-148   | Basidiomycota | n         | Agaricomycetes  | D                |
| priority_effects_CL_21   | -                                                                         | -                 | -                    | -                    | 0.11                 | -                  | -                | -                     | 0.11               | <i>Hypholoma fasciculare</i>     | UDB011502   | 3E-159   | Basidiomycota | n         | Agaricomycetes  | D                |
| priority_effects_CL_385  | -                                                                         | -                 | -                    | -                    | -                    | 0.14               | 0.08             | -                     | 0.11               | Basidiomycota spDi2824           | KC514899    | 5e-37    | Basidiomycota | n         | n               | D                |

| OTU ID no.               | Occurrence as % of total sequences occurring in each precoloniser species |                   |                      |                      |                      |                    |                  |                       | Average occurrence | Identification details             |             | Taxonomy |               |                |                 | Functional group |
|--------------------------|---------------------------------------------------------------------------|-------------------|----------------------|----------------------|----------------------|--------------------|------------------|-----------------------|--------------------|------------------------------------|-------------|----------|---------------|----------------|-----------------|------------------|
|                          | Control                                                                   | <i>V.comedens</i> | <i>H. fragiforme</i> | <i>B. nummularia</i> | <i>T. versicolor</i> | <i>S. hirsutum</i> | <i>B. adusta</i> | <i>H. fasciculare</i> |                    | Taxon name                         | Accession # | E-value  | Phylum        | Subphylum      | Class           |                  |
| priority_effects_CL_130  | -                                                                         | -                 | 0.12                 | -                    | -                    | -                  | 0.08             | -                     | 0.10               | uncultured Basidiomycete           | EU517045    | 1e-106   | Basidiomycota | n              | n               | D                |
| priority_effects_CL_365  | -                                                                         | -                 | 0.12                 | 0.06                 | -                    | -                  | -                | -                     | 0.09               | uncultured fungus                  | KF297177    | 1e-37    | Basidiomycota | n              | Agaricomycetes  | D                |
| priority_effects_CL_0    | 26.64                                                                     | 1.20              | 18.82                | 21.03                | 2.70                 | 0.84               | 14.93            | 1.32                  | 10.94              | <i>Lasiosphaeria hispida</i>       | JN942173    | 1e-126   | Ascomycota    | Pezizomycotina | Sordariomycetes | C                |
| priority_effects_CL_1    | 1.09                                                                      | 2.90              | 5.02                 | 3.15                 | 26.10                | 26.97              | 10.96            | 7.71                  | 10.49              | <i>Phialocephala dimorphospora</i> | AB671498    | 1E-122   | Ascomycota    | Pezizomycotina | Leotiomycetes   | C                |
| priority_effects_CL_2    | 9.85                                                                      | 0.44              | 13.51                | 15.21                | -                    | 0.98               | 0.70             | 0.44                  | 5.88               | uncultured Ascomycete              | JF449882    | 1e-122   | Ascomycota    | Pezizomycotina | Leotiomycetes   | C                |
| priority_effects_CL_8    | 0.30                                                                      | 0.38              | 0.35                 | -                    | 7.20                 | 5.76               | 18.82            | 5.07                  | 5.41               | <i>Chaetosphaeria innumera</i>     | AF178551    | 1e-116   | Ascomycota    | Pezizomycotina | Sordariomycetes | C                |
| priority_effects_CL_19   | -                                                                         | 2.65              | -                    | -                    | 0.11                 | 15.73              | 0.23             | -                     | 4.68               | <i>Hyphodiscus hymeniophilus</i>   | GU727550    | 5e-126   | Ascomycota    | Pezizomycotina | Leotiomycetes   | C                |
| priority_effects_CL_165  | -                                                                         | -                 | -                    | -                    | -                    | 4.49               | -                | -                     | 4.49               | <i>Hyphodiscus hymeniophilus</i>   | GU727555    | 5e-121   | Ascomycota    | Pezizomycotina | Leotiomycetes   | C                |
| priority_effects_CL_35   | 4.20                                                                      | -                 | -                    | -                    | -                    | -                  | -                | -                     | 4.20               | uncultured fungus                  | JX915518    | 8e-109   | Ascomycota    | n              | n               | C                |
| priority_effects_CL_3    | 0.24                                                                      | 18.41             | 0.06                 | -                    | -                    | 0.14               | 0.54             | -                     | 3.88               | <i>Helotiales sp SGG25</i>         | EU715657    | 8e-124   | Ascomycota    | Pezizomycotina | Leotiomycetes   | C                |
| priority_effects_CL_68   | -                                                                         | -                 | -                    | -                    | 0.11                 | -                  | -                | -                     | 5.95               | <i>Helotiales sp JP2013</i>        | JX981510    | 2e-125   | Ascomycota    | Pezizomycotina | Dothideomycetes | C                |
| priority_effects_CL_125  | -                                                                         | -                 | -                    | -                    | 2.92                 | -                  | -                | -                     | 2.92               | <i>Menispora ciliata</i>           | EU488737    | 1E-097   | Ascomycota    | Pezizomycotina | Sordariomycetes | C                |
| priority_effects_CL_7    | 0.12                                                                      | 3.47              | 10.10                | 1.09                 | 0.56                 | 0.14               | 3.81             | 1.10                  | 2.55               | <i>Chalara sp mh10666</i>          | GQ996180    | 8e-124   | Ascomycota    | n              | n               | C                |
| priority_effects_CL_17   | 0.06                                                                      | 11.16             | 1.21                 | -                    | 1.24                 | 0.42               | 2.33             | 0.66                  | 2.44               | <i>Hypocrea pachybasioides</i>     | KC884809    | 7e-135   | Ascomycota    | n              | n               | C                |
| priority_effects_CL_73   | -                                                                         | -                 | -                    | 2.12                 | -                    | -                  | -                | -                     | 2.12               | uncultured Ascomycete              | KC588589    | 8e-124   | Ascomycota    | n              | n               | C                |
| priority_effects_CL_14   | 0.12                                                                      | -                 | 0.35                 | 5.64                 | -                    | -                  | -                | -                     | 2.03               | <i>Lasiosphaeria lanuginosa</i>    | AY587918    | 8e-124   | Ascomycota    | Pezizomycotina | Sordariomycetes | C                |
| priority_effects_CL_25   | 0.61                                                                      | 0.44              | 0.69                 | 0.24                 | 1.24                 | 6.88               | 3.97             | 1.32                  | 1.92               | <i>Lecythophora sp olrim15</i>     | AY781228    | 5e-106   | Ascomycota    | Pezizomycotina | Sordariomycetes | C                |
| priority_effects_CL_11   | 2.07                                                                      | 3.85              | 0.06                 | 0.67                 | 2.02                 | -                  | 2.33             | -                     | 1.83               | <i>Meliniomyces sp mh34632</i>     | GQ996162    | 8e-124   | Ascomycota    | n              | n               | C                |
| priority_effects_CL_12   | 0.12                                                                      | -                 | -                    | 0.06                 | 6.41                 | 0.14               | 2.26             | -                     | 1.80               | uncultured Ascomycete              | HM030597    | 6e-115   | Ascomycota    | n              | n               | C                |
| priority_effects_CL_51   | -                                                                         | 0.06              | -                    | -                    | 4.84                 | 0.56               | 1.79             | 0.88                  | 1.63               | <i>Chaetosphaeria chloroconia</i>  | AF178542    | 2e-124   | Ascomycota    | Pezizomycotina | Sordariomycetes | C                |
| priority_effects_CL_132  | -                                                                         | -                 | -                    | -                    | 1.69                 | 1.26               | -                | -                     | 1.48               | <i>Cryptodiscus microstomus</i>    | FJ904676    | 2e-124   | Ascomycota    | Pezizomycotina | Lecanoromycetes | C                |
| priority_effects_CL_102  | -                                                                         | -                 | -                    | -                    | 2.59                 | 0.28               | -                | -                     | 1.43               | <i>Zignoella pulviscula</i>        | AF178543    | 5e-106   | Ascomycota    | Pezizomycotina | Sordariomycetes | C                |
| priority_effects_CL_16   | 0.06                                                                      | 0.13              | 0.06                 | -                    | 5.29                 | -                  | 1.48             | -                     | 1.40               | uncultured Ascomycete              | JX860449    | 2e-119   | Ascomycota    | Pezizomycotina | Leotiomycetes   | C                |
| priority_effects_CL_78   | -                                                                         | -                 | -                    | -                    | -                    | -                  | -                | 1.10                  | 1.10               | uncultured Ascomycete              | QJ313083    | 1e-112   | Ascomycota    | Pezizomycotina | Leotiomycetes   | C                |
| priority_effects_CL_71   | -                                                                         | -                 | -                    | -                    | 1.80                 | -                  | 0.39             | -                     | 1.09               | uncultured Ascomycete              | AY699673    | 3e-88    | Ascomycota    | n              | n               | C                |
| priority_effects_CL_119  | -                                                                         | -                 | 1.04                 | -                    | -                    | -                  | -                | -                     | 1.04               | uncultured Ascomycete              | JX860440    | 1e-116   | Ascomycota    | Pezizomycotina | Sordariomycetes | C                |
| priority_effects_CL_263  | -                                                                         | -                 | -                    | -                    | -                    | 0.98               | -                | -                     | 0.98               | <i>Cryptodiscus microstomus</i>    | FJ904676    | 5e-111   | Ascomycota    | Pezizomycotina | Lecanoromycetes | C                |
| priority_effects_CL_55   | -                                                                         | -                 | 0.06                 | -                    | 1.12                 | 0.28               | 2.95             | 0.22                  | 0.93               | uncultured Ascomycete              | HQ212094    | 1e-77    | Ascomycota    | Pezizomycotina | Leotiomycetes   | C                |
| priority_effects_CL_36   | -                                                                         | 1.58              | -                    | -                    | 2.14                 | 0.28               | 0.39             | 0.22                  | 0.92               | <i>Haplographium catenatum</i>     | FJ839621    | 1e-121   | Ascomycota    | Pezizomycotina | Leotiomycetes   | C                |
| priority_effects_CL_116  | -                                                                         | -                 | -                    | -                    | -                    | -                  | -                | 0.88                  | 0.88               | <i>Cryptococcus sp ATCCMYA4669</i> | KC171331    | 3e-78    | Ascomycota    | Pezizomycotina | Leotiomycetes   | C                |
| priority_effects_CL_24   | 1.70                                                                      | -                 | 1.62                 | 0.06                 | -                    | 0.14               | -                | -                     | 0.88               | uncultured Ascomycete              | HQ433062    | 2e-104   | Ascomycota    | Pezizomycotina | Leotiomycetes   | C                |
| priority_effects_CL_37   | 1.09                                                                      | -                 | 0.52                 | -                    | -                    | -                  | -                | -                     | 0.81               | uncultured Helotiales              | JF449728    | 1e-96    | Ascomycota    | Pezizomycotina | Leotiomycetes   | C                |
| priority_effects_CL_33   | 0.06                                                                      | 0.32              | -                    | -                    | 1.01                 | -                  | 0.86             | 1.76                  | 0.80               | <i>Haplographium catenatum</i>     | FJ839622    | 2e-119   | Ascomycota    | Pezizomycotina | Leotiomycetes   | C                |
| priority_effects_CL_29   | 0.30                                                                      | 0.06              | 0.75                 | 2.06                 | -                    | -                  | -                | -                     | 0.79               | <i>Cylindrotrichum hennebertii</i> | AF178560    | 2e-115   | Ascomycota    | Pezizomycotina | Sordariomycetes | C                |
| priority_effects_CL_20   | 1.82                                                                      | -                 | 0.35                 | -                    | -                    | -                  | 0.08             | -                     | 0.75               | <i>Cadophora malorum</i>           | DQ404350    | 8E-124   | Ascomycota    | Pezizomycotina | Leotiomycetes   | C                |
| priority_effects_CL_128  | -                                                                         | -                 | -                    | -                    | -                    | 1.26               | -                | 0.22                  | 0.74               | <i>Lecythophora sp olrim15</i>     | AY781228    | 2e-89    | Ascomycota    | Pezizomycotina | Sordariomycetes | C                |
| priority_effects_CL_88   | 2.31                                                                      | 0.06              | 0.35                 | -                    | -                    | 0.14               | -                | -                     | 0.72               | uncultured Ascomycete              | HQ433062    | 3e-103   | Ascomycota    | n              | n               | C                |
| priority_effects_CL_97   | -                                                                         | -                 | -                    | -                    | -                    | -                  | -                | 0.66                  | 0.66               | uncultured Ascomycete              | HQ873357    | 4e-102   | Ascomycota    | n              | n               | C                |
| priority_effects_CL_2218 | -                                                                         | -                 | -                    | -                    | -                    | -                  | -                | 0.66                  | 0.66               | <i>Lecythophora sp olrim15</i>     | AY781228    | 5e-111   | Ascomycota    | Pezizomycotina | Sordariomycetes | C                |
| priority_effects_CL_167  | -                                                                         | -                 | -                    | -                    | 0.90                 | 0.42               | -                | -                     | 0.66               | uncultured Ascomycete              | DQ914715    | 2e-49    | Ascomycota    | Pezizomycotina | Leotiomycetes   | C                |
| priority_effects_CL_66   | -                                                                         | 0.13              | -                    | -                    | 0.11                 | 1.69               | -                | 0.66                  | 0.65               | uncultured Ascomycete              | KC965986    | 1e-112   | Ascomycota    | n              | n               | C                |
| priority_effects_CL_46   | -                                                                         | 1.20              | -                    | -                    | 0.11                 | 0.70               | 0.39             | -                     | 0.60               | <i>Lecythophora sp olrim15</i>     | AY781228    | 5e-96    | Ascomycota    | Pezizomycotina | Sordariomycetes | C                |
| priority_effects_CL_316  | -                                                                         | -                 | 0.58                 | -                    | -                    | -                  | -                | -                     | 0.58               | uncultured Ascomycete              | AM260896    | 5e-106   | Ascomycota    | Pezizomycotina | Leotiomycetes   | C                |
| priority_effects_CL_32   | 0.91                                                                      | -                 | 0.12                 | 0.55                 | -                    | -                  | -                | -                     | 0.52               | <i>Sordariales sp 7SAp341</i>      | AB746927    | 3e-123   | Ascomycota    | Pezizomycotina | Sordariomycetes | C                |
| priority_effects_CL_104  | -                                                                         | 0.06              | -                    | -                    | 1.35                 | 0.14               | -                | -                     | 0.52               | <i>Phialophora clavisporea</i>     | AB190868    | 2e-125   | Ascomycota    | Pezizomycotina | Eurotiomycetes  | C                |
| priority_effects_CL_60   | 0.55                                                                      | 1.32              | 0.06                 | -                    | -                    | 0.14               | -                | -                     | 0.52               | uncultured Ascomycete              | GU309234    | 4e-122   | Ascomycota    | n              | n               | C                |
| priority_effects_CL_79   | 0.49                                                                      | -                 | -                    | -                    | -                    | -                  | -                | -                     | 0.49               | <i>Ascocoryne sarcoides</i>        | HM152550    | 8e-124   | Ascomycota    | Pezizomycotina | Leotiomycetes   | C                |
| priority_effects_CL_54   | -                                                                         | 1.13              | 0.17                 | -                    | 0.11                 | -                  | -                | -                     | 0.47               | uncultured Ascomycete              | GQ996132    | 2e-114   | Ascomycota    | n              | n               | C                |
| priority_effects_CL_27   | 0.79                                                                      | 0.38              | 0.64                 | 0.48                 | -                    | -                  | 0.08             | -                     | 0.47               | uncultured Ascomycete              | JX535087    | 5e-116   | Ascomycota    | n              | n               | C                |
| priority_effects_CL_69   | 0.06                                                                      | -                 | 0.87                 | -                    | -                    | -                  | -                | -                     | 0.46               | <i>Haptocillium sinense</i>        | AJ292417    | 2e-105   | Ascomycota    | Pezizomycotina | Sordariomycetes | C                |

| OTU ID no.              | Occurrence as % of total sequences occurring in each precoloniser species |                   |                      |                      |                      |                    |                  |                       | Average occurrence | Identification details                 |             |         | Taxonomy   |                |                 | Functional group |
|-------------------------|---------------------------------------------------------------------------|-------------------|----------------------|----------------------|----------------------|--------------------|------------------|-----------------------|--------------------|----------------------------------------|-------------|---------|------------|----------------|-----------------|------------------|
|                         | Control                                                                   | <i>V.comedens</i> | <i>H. fragiforme</i> | <i>B. nummularia</i> | <i>T. versicolor</i> | <i>S. hirsutum</i> | <i>B. adusta</i> | <i>H. fasciculare</i> |                    | Taxon name                             | Accession # | E-value | Phylum     | Subphylum      | Class           |                  |
| priority_effects_CL_174 | 0.06                                                                      | -                 | 0.87                 | -                    | -                    | -                  | -                | -                     | 0.46               | uncultured Ascomycete                  | DQ273345    | 3e-108  | Ascomycota | Pezizomycotina | Sordariomycetes | C                |
| priority_effects_CL_62  | -                                                                         | 0.44              | -                    | -                    | -                    | -                  | -                | -                     | 0.44               | uncultured Ascomycete                  | FJ265919    | 5e-17   | Ascomycota | n              | n               | C                |
| priority_effects_CL_152 | -                                                                         | -                 | -                    | -                    | -                    | -                  | -                | 0.44                  | 0.44               | uncultured fungus                      | JQ313083    | 1e-101  | Ascomycota | Pezizomycotina | Leotiomycetes   | C                |
| priority_effects_CL_177 | -                                                                         | -                 | -                    | -                    | -                    | -                  | -                | 0.44                  | 0.44               | uncultured Ascomycete                  | FJ820734    | 1e-132  | Ascomycota | n              | n               | C                |
| priority_effects_CL_28  | -                                                                         | -                 | -                    | -                    | -                    | 0.14               | 0.08             | 1.10                  | 0.44               | <i>Hypoxylon fragiforme</i>            | JN979420    | 2e-134  | Ascomycota | Pezizomycotina | Sordariomycetes | C                |
| priority_effects_CL_42  | 1.16                                                                      | -                 | 0.29                 | 0.12                 | -                    | 0.14               | -                | -                     | 0.43               | <i>Calosphaeriales sp ICMP17422</i>    | EU770223    | 5e-111  | Ascomycota | Pezizomycotina | Sordariomycetes | C                |
| priority_effects_CL_30  | 0.06                                                                      | 0.32              | 0.40                 | 0.06                 | 0.56                 | 0.98               | 0.78             | 0.22                  | 0.42               | <i>Lecythophora sp OTU030</i>          | HE998721    | 2e-110  | Ascomycota | Pezizomycotina | Sordariomycetes | C                |
| priority_effects_CL_105 | -                                                                         | -                 | -                    | -                    | -                    | 0.42               | -                | -                     | 0.42               | <i>Lecythophora sp olrim15</i>         | AY781228    | 8e-94   | Ascomycota | Pezizomycotina | Sordariomycetes | C                |
| priority_effects_CL_43  | 0.06                                                                      | -                 | 0.35                 | 0.85                 | -                    | -                  | -                | -                     | 0.42               | <i>Massarina rubi</i>                  | AF383963    | 2E-130  | Ascomycota | Pezizomycotina | Dothideomycetes | C                |
| priority_effects_CL_50  | 1.03                                                                      | -                 | 0.12                 | 0.06                 | -                    | -                  | -                | -                     | 0.40               | <i>Phaeoacremonium austroafricanum</i> | EU552158    | 2e-135  | Ascomycota | Pezizomycotina | Sordariomycetes | C                |
| priority_effects_CL_52  | 0.06                                                                      | 1.07              | 0.06                 | -                    | -                    | -                  | -                | -                     | 0.40               | uncultured fungus                      | KC588551    | 4e-117  | Ascomycota | n              | n               | C                |
| priority_effects_CL_47  | -                                                                         | -                 | 0.64                 | 0.12                 | -                    | -                  | -                | -                     | 0.38               | uncultured Ascomycete                  | GQ921793    | 8e-110  | Ascomycota | n              | n               | C                |
| priority_effects_CL_49  | -                                                                         | 0.50              | -                    | -                    | 0.67                 | 0.14               | 0.16             | -                     | 0.37               | <i>Cladosporium sp CBS12588</i>        | AF050264    | 2e-135  | Ascomycota | Pezizomycotina | Dothideomycetes | C                |
| priority_effects_CL_92  | -                                                                         | -                 | 0.12                 | 0.67                 | 0.22                 | -                  | -                | -                     | 0.34               | uncultured Ascomycete                  | EF218791    | 6e-95   | Ascomycota | Pezizomycotina | Leotiomycetes   | C                |
| priority_effects_CL_56  | 0.79                                                                      | -                 | 0.06                 | 0.12                 | -                    | -                  | -                | -                     | 0.32               | uncultured Ascomycete                  | KC588635    | 3e-108  | Ascomycota | n              | n               | C                |
| priority_effects_CL_87  | -                                                                         | -                 | -                    | -                    | 0.11                 | 0.14               | 0.70             | -                     | 0.32               | <i>Lecanoromycetes sp CHAa18</i>       | EF373561    | 4e-87   | Ascomycota | n              | n               | C                |
| priority_effects_CL_115 | -                                                                         | 0.32              | -                    | -                    | -                    | -                  | -                | -                     | 0.32               | <i>Dactylella rhopalota</i>            | DQ494370    | 2E-139  | Ascomycota | Pezizomycotina | Orbiliomycetes  | C                |
| priority_effects_CL_127 | -                                                                         | 0.32              | -                    | -                    | -                    | -                  | -                | -                     | 0.32               | uncultured Ascomycete                  | HQ432991    | 2e-100  | Ascomycota | n              | n               | C                |
| priority_effects_CL_61  | 0.18                                                                      | 0.32              | 0.58                 | 0.18                 | -                    | -                  | -                | -                     | 0.31               | uncultured Ascomycete                  | KC588645    | 4e-127  | Ascomycota | n              | n               | C                |
| priority_effects_CL_111 | -                                                                         | 0.57              | 0.06                 | -                    | -                    | -                  | -                | -                     | 0.31               | uncultured Ascomycete                  | KC588586    | 8e-129  | Ascomycota | n              | n               | C                |
| priority_effects_CL_98  | 0.30                                                                      | -                 | -                    | -                    | -                    | -                  | -                | -                     | 0.30               | <i>Neonectria hubeiensis</i>           | FJ560439    | 2e-130  | Ascomycota | Pezizomycotina | Sordariomycetes | C                |
| priority_effects_CL_108 | 0.30                                                                      | -                 | -                    | -                    | -                    | -                  | -                | -                     | 0.30               | uncultured Ascomycete                  | KC588574    | 8e-119  | Ascomycota | n              | n               | C                |
| priority_effects_CL_63  | -                                                                         | -                 | 0.29                 | -                    | -                    | -                  | -                | -                     | 0.29               | <i>Cadophora fastigiata</i>            | KC514850    | 2e-125  | Ascomycota | n              | n               | C                |
| priority_effects_CL_135 | 0.18                                                                      | 0.25              | 0.40                 | 0.18                 | 0.45                 | 0.42               | 0.08             | -                     | 0.28               | <i>Exophiala sp TU181006</i>           | AY781228    | 5e-116  | Ascomycota | Pezizomycotina | Sordariomycetes | C                |
| priority_effects_CL_147 | -                                                                         | -                 | -                    | -                    | 0.11                 | -                  | -                | 0.44                  | 0.28               | uncultured Ascomycete                  | HQ433088    | 2e-134  | Ascomycota | n              | n               | C                |
| priority_effects_CL_101 | 0.06                                                                      | 0.06              | -                    | -                    | 0.22                 | 0.70               | -                | -                     | 0.26               | <i>Pyrenochaeta sp AU/DBT237</i>       | KC963916    | 8e-129  | Ascomycota | n              | n               | C                |
| priority_effects_CL_109 | -                                                                         | 0.25              | -                    | -                    | -                    | -                  | -                | -                     | 0.25               | <i>Pithomyces valparadisicus</i>       | EU552152    | 9e-69   | Ascomycota | Pezizomycotina | Dothideomycetes | C                |
| priority_effects_CL_40  | 0.06                                                                      | -                 | 0.64                 | 0.06                 | -                    | -                  | -                | -                     | 0.25               | uncultured Ascomycete                  | JF449592    | 3e-123  | Ascomycota | Pezizomycotina | Sordariomycetes | C                |
| priority_effects_CL_95  | -                                                                         | 0.44              | -                    | 0.06                 | -                    | -                  | -                | -                     | 0.25               | uncultured Ascomycete                  | JQ346840    | 4e-102  | Ascomycota | Pezizomycotina | Leotiomycetes   | C                |
| priority_effects_CL_75  | -                                                                         | 0.38              | 0.12                 | -                    | -                    | -                  | -                | -                     | 0.25               | uncultured Ascomycete                  | DQ447998    | 1e-116  | Ascomycota | n              | n               | C                |
| priority_effects_CL_83  | 0.24                                                                      | -                 | -                    | -                    | -                    | -                  | -                | -                     | 0.24               | uncultured Ascomycete                  | JF449878    | 2e-130  | Ascomycota | Pezizomycotina | Sordariomycetes | C                |
| priority_effects_CL_80  | 0.24                                                                      | -                 | 0.40                 | 0.06                 | -                    | -                  | -                | -                     | 0.24               | <i>Arbusculina fragmentans</i>         | KC834042    | 4e-107  | Ascomycota | n              | n               | C                |
| priority_effects_CL_70  | -                                                                         | -                 | 0.23                 | -                    | -                    | -                  | -                | -                     | 0.23               | <i>Arbusculina fragmentans</i>         | KC834042    | 4e-112  | Ascomycota | n              | n               | C                |
| priority_effects_CL_96  | -                                                                         | 0.38              | -                    | -                    | -                    | -                  | 0.08             | -                     | 0.23               | uncultured Ascomycete                  | KC588610    | 2e-95   | Ascomycota | n              | n               | C                |
| priority_effects_CL_107 | -                                                                         | -                 | -                    | -                    | 0.22                 | -                  | -                | -                     | 0.22               | uncultured Ascomycete                  | KC965795    | 1e-66   | Ascomycota | n              | n               | C                |
| priority_effects_CL_397 | -                                                                         | -                 | -                    | -                    | 0.22                 | -                  | -                | -                     | 0.22               | <i>Cryptodiscus microstomus</i>        | FJ904676    | 5e-121  | Ascomycota | Pezizomycotina | Lecanoromycetes | C                |
| priority_effects_CL_45  | -                                                                         | 0.19              | 0.06                 | -                    | -                    | -                  | 0.16             | 0.44                  | 0.21               | uncultured Ascomycete                  | JX860474    | 2e-125  | Ascomycota | Pezizomycotina | Leotiomycetes   | C                |
| priority_effects_CL_91  | -                                                                         | -                 | 0.35                 | 0.06                 | -                    | -                  | -                | -                     | 0.20               | uncultured Ascomycete                  | GQ921793    | 4e-112  | Ascomycota | n              | n               | C                |
| priority_effects_CL_67  | 0.24                                                                      | -                 | 0.29                 | 0.06                 | -                    | -                  | -                | -                     | 0.20               | <i>Coniochaetaeae sp RS050</i>         | EU082785    | 9e-64   | Ascomycota | Pezizomycotina | Sordariomycetes | C                |
| priority_effects_CL_229 | -                                                                         | 0.19              | -                    | -                    | -                    | -                  | -                | -                     | 0.19               | uncultured Ascomycete                  | GU309234    | 5e-111  | Ascomycota | n              | n               | C                |
| priority_effects_CL_265 | -                                                                         | 0.19              | -                    | -                    | -                    | -                  | -                | -                     | 0.19               | uncultured Ascomycete                  | JQ312710    | 1e-117  | Ascomycota | n              | n               | C                |
| priority_effects_CL_121 | 0.18                                                                      | -                 | -                    | -                    | -                    | -                  | -                | -                     | 0.18               | uncultured Ascomycete                  | KC588576    | 2e-125  | Ascomycota | n              | n               | C                |
| priority_effects_CL_129 | 0.18                                                                      | -                 | -                    | -                    | -                    | -                  | -                | -                     | 0.18               | uncultured Ascomycete                  | KC588649    | 3e-138  | Ascomycota | Pezizomycotina | Sordariomycetes | C                |
| priority_effects_CL_149 | -                                                                         | -                 | -                    | 0.18                 | -                    | -                  | -                | -                     | 0.18               | uncultured Ascomycete                  | JF433007    | 5e-121  | Ascomycota | Pezizomycotina | Sordariomycetes | C                |
| priority_effects_CL_233 | -                                                                         | -                 | -                    | 0.18                 | -                    | -                  | -                | -                     | 0.18               | uncultured Ascomycete                  | GQ996173    | 8e-104  | Ascomycota | n              | n               | C                |
| priority_effects_CL_74  | 0.24                                                                      | -                 | 0.12                 | 0.18                 | -                    | -                  | -                | -                     | 0.18               | <i>Phaeoacremonium rubrigenum</i>      | AJ575811    | 5e-131  | Ascomycota | Pezizomycotina | Sordariomycetes | C                |
| priority_effects_CL_90  | 0.12                                                                      | -                 | 0.35                 | 0.06                 | -                    | -                  | -                | -                     | 0.18               | <i>Cosmospora sp NRRL28291</i>         | JN615481    | 4e-132  | Ascomycota | Pezizomycotina | Sordariomycetes | C                |
| priority_effects_CL_141 | -                                                                         | -                 | 0.17                 | -                    | -                    | -                  | -                | -                     | 0.17               | uncultured Ascomycete                  | JF449882    | 2e-109  | Ascomycota | Pezizomycotina | Leotiomycetes   | C                |
| priority_effects_CL_223 | -                                                                         | -                 | -                    | -                    | 0.11                 | -                  | -                | 0.22                  | 0.17               | <i>Haplographium catenatum</i>         | FJ839622    | 5e-101  | Ascomycota | Pezizomycotina | Leotiomycetes   | C                |
| priority_effects_CL_131 | -                                                                         | -                 | -                    | 0.18                 | -                    | 0.14               | -                | -                     | 0.16               | <i>Chaetosphaeria tulasneorum</i>      | AF178547    | 6e-125  | Ascomycota | Pezizomycotina | Sordariomycetes | C                |

| OTU ID no.               | Occurrence as % of total sequences occurring in each precoloniser species |                   |                      |                      |                      |                    |                  |                       | Average occurrence | Identification details             |             |         | Taxonomy   |                |                 | Functional group |
|--------------------------|---------------------------------------------------------------------------|-------------------|----------------------|----------------------|----------------------|--------------------|------------------|-----------------------|--------------------|------------------------------------|-------------|---------|------------|----------------|-----------------|------------------|
|                          | Control                                                                   | <i>V.comedens</i> | <i>H. fragiforme</i> | <i>B. nummularia</i> | <i>T. versicolor</i> | <i>S. hirsutum</i> | <i>B. adusta</i> | <i>H. fasciculare</i> |                    | Taxon name                         | Accession # | E-value | Phylum     | Subphylum      | Class           |                  |
| priority_effects_CL_330  | -                                                                         | -                 | -                    | -                    | 0.11                 | 0.14               | -                | 0.22                  | 0.16               | uncultured Ascomycete              | AB089668    | 2e-59   | Ascomycota | n              | n               | C                |
| priority_effects_CL_138  | -                                                                         | -                 | -                    | -                    | -                    | -                  | 0.16             | -                     | 0.16               | <i>Cristinia helvetica</i>         | UDB016420   | 8e-130  | Ascomycota | Pezizomycotina | Sordariomycetes | C                |
| priority_effects_CL_150  | -                                                                         | -                 | -                    | -                    | -                    | -                  | 0.16             | -                     | 0.16               | <i>Chaetosphaeria</i> sp 235OA2013 | JX535168    | 6e-125  | Ascomycota | Pezizomycotina | Sordariomycetes | C                |
| priority_effects_CL_314  | -                                                                         | -                 | -                    | -                    | -                    | -                  | 0.16             | -                     | 0.16               | <i>Chloridium lignicola</i>        | AF178544    | 1e-117  | Ascomycota | Pezizomycotina | Sordariomycetes | C                |
| priority_effects_CL_702  | -                                                                         | -                 | -                    | -                    | -                    | -                  | 0.16             | -                     | 0.16               | <i>Haplographium catenatum</i>     | FJ839622    | 3e-83   | Ascomycota | Pezizomycotina | Leotiomycetes   | C                |
| priority_effects_CL_1842 | -                                                                         | -                 | -                    | -                    | -                    | -                  | 0.16             | -                     | 0.16               | <i>Pleosporales</i> sp E02         | HQ115654    | 1e-126  | Ascomycota | Pezizomycotina | Dothideomycetes | C                |
| priority_effects_CL_57   | 0.24                                                                      | -                 | -                    | 0.06                 | -                    | -                  | -                | -                     | 0.15               | <i>Pezizomycetes</i> sp WF148      | HQ130704    | 2e-85   | Ascomycota | Pezizomycotina | Pezizomycetes   | C                |
| priority_effects_CL_198  | -                                                                         | -                 | -                    | -                    | -                    | -                  | 0.08             | 0.22                  | 0.15               | <i>Chloridium lignicola</i>        | AF178544    | 1e-97   | Ascomycota | Pezizomycotina | Sordariomycetes | C                |
| priority_effects_CL_133  | 0.06                                                                      | -                 | -                    | -                    | 0.22                 | -                  | -                | -                     | 0.14               | uncultured Ascomycete              | HM044632    | 4e-102  | Ascomycota | n              | n               | C                |
| priority_effects_CL_158  | -                                                                         | 0.06              | -                    | -                    | -                    | 0.14               | -                | 0.22                  | 0.14               | uncultured Ascomycete              | HQ433088    | 4e-122  | Ascomycota | n              | n               | C                |
| priority_effects_CL_222  | 0.12                                                                      | -                 | -                    | -                    | -                    | 0.14               | -                | -                     | 0.13               | uncultured Ascomycete              | GU327446    | 1e-132  | Ascomycota | Pezizomycotina | Sordariomycetes | C                |
| priority_effects_CL_295  | -                                                                         | -                 | -                    | -                    | 0.11                 | 0.14               | -                | -                     | 0.13               | uncultured Ascomycete              | EF521221    | 1e-116  | Ascomycota | Pezizomycotina | Leotiomycetes   | C                |
| priority_effects_CL_100  | -                                                                         | 0.13              | -                    | -                    | -                    | -                  | -                | -                     | 0.13               | <i>Menispora tortuosa</i>          | AF178558    | 8e-114  | Ascomycota | Pezizomycotina | Sordariomycetes | C                |
| priority_effects_CL_142  | -                                                                         | 0.13              | -                    | -                    | -                    | -                  | -                | -                     | 0.13               | uncultured Ascomycete              | KC588652    | 2e-125  | Ascomycota | Pezizomycotina | Sordariomycetes | C                |
| priority_effects_CL_146  | -                                                                         | 0.13              | -                    | -                    | -                    | -                  | -                | -                     | 0.13               | <i>Scytalidium lignicola</i>       | GU934579    | 1E-122  | Ascomycota | Pezizomycotina | Leotiomycetes   | C                |
| priority_effects_CL_155  | -                                                                         | 0.13              | -                    | -                    | -                    | -                  | -                | -                     | 0.13               | <i>Chalara piceae-abietis</i>      | FR667231    | 1e-101  | Ascomycota | Pezizomycotina | Leotiomycetes   | C                |
| priority_effects_CL_247  | -                                                                         | 0.13              | -                    | -                    | -                    | -                  | -                | -                     | 0.13               | <i>Dactylella</i> sp AS60288       | DQ494363    | 7e-140  | Ascomycota | Pezizomycotina | Orbiliomycetes  | C                |
| priority_effects_CL_275  | -                                                                         | 0.13              | -                    | -                    | -                    | -                  | -                | -                     | 0.13               | unknown fungus                     | GQ996162    | 2e-105  | Ascomycota | Pezizomycotina | Leotiomycetes   | C                |
| priority_effects_CL_1235 | -                                                                         | 0.13              | -                    | -                    | -                    | -                  | -                | -                     | 0.13               | uncultured Ascomycete              | KF297027    | 4e-132  | Ascomycota | Pezizomycotina | Eurotiomycetes  | C                |
| priority_effects_CL_93   | 0.06                                                                      | 0.25              | -                    | 0.06                 | -                    | -                  | -                | -                     | 0.12               | <i>Dactylella mammillata</i>       | AY902794    | 4e-137  | Ascomycota | Pezizomycotina | Orbiliomycetes  | C                |
| priority_effects_CL_81   | 0.12                                                                      | -                 | -                    | -                    | -                    | -                  | -                | -                     | 0.12               | uncultured Ascomycete              | HM230871    | 4e-47   | Ascomycota | Pezizomycotina | Leotiomycetes   | C                |
| priority_effects_CL_84   | 0.12                                                                      | -                 | -                    | -                    | -                    | -                  | -                | -                     | 0.12               | uncultured Ascomycete              | KF296725    | 3e-118  | Ascomycota | n              | n               | C                |
| priority_effects_CL_117  | 0.12                                                                      | -                 | -                    | -                    | -                    | -                  | -                | -                     | 0.12               | uncultured Ascomycete              | HQ433062    | 5e-96   | Ascomycota | Pezizomycotina | Leotiomycetes   | C                |
| priority_effects_CL_134  | 0.06                                                                      | -                 | -                    | 0.18                 | -                    | -                  | -                | -                     | 0.12               | <i>Exophiala</i> sp                | EF115305    | 1e-147  | Ascomycota | Pezizomycotina | Eurotiomycetes  | C                |
| priority_effects_CL_243  | -                                                                         | -                 | -                    | 0.12                 | -                    | -                  | -                | -                     | 0.12               | <i>Cylindrotrichum hennebertii</i> | AF178560    | 5e-106  | Ascomycota | Pezizomycotina | Sordariomycetes | C                |
| priority_effects_CL_411  | -                                                                         | -                 | -                    | 0.12                 | -                    | -                  | -                | -                     | 0.12               | <i>Massarina</i> sp MUT4323        | KC339223    | 1e-107  | Ascomycota | Pezizomycotina | Dothideomycetes | C                |
| priority_effects_CL_520  | -                                                                         | -                 | -                    | 0.12                 | -                    | -                  | -                | -                     | 0.12               | <i>Phialocephala fusca</i>         | AB671500    | 4E-082  | Ascomycota | Pezizomycotina | Sordariomycetes | C                |
| priority_effects_CL_82   | -                                                                         | 0.13              | -                    | -                    | 0.11                 | -                  | -                | -                     | 0.12               | <i>Hypocreales</i> sp TR173        | HQ608153    | 2e-119  | Ascomycota | Pezizomycotina | Sordariomycetes | C                |
| priority_effects_CL_2040 | -                                                                         | -                 | 0.12                 | -                    | -                    | -                  | -                | -                     | 0.12               | <i>Trichoderma hamatum</i>         | X93975      | 7e-130  | Ascomycota | n              | n               | C                |
| priority_effects_CL_2288 | -                                                                         | -                 | 0.12                 | -                    | -                    | -                  | -                | -                     | 0.12               | uncultured Ascomycete              | HQ433062    | 8e-84   | Ascomycota | Pezizomycotina | Leotiomycetes   | C                |
| priority_effects_CL_120  | -                                                                         | -                 | 0.12                 | -                    | 0.11                 | -                  | -                | -                     | 0.11               | <i>Cladophialophora</i> sp.        | DQ124131    | 9e-134  | Ascomycota | n              | n               | C                |
| priority_effects_CL_398  | -                                                                         | -                 | -                    | -                    | -                    | 0.14               | 0.08             | -                     | 0.11               | uncultured Ascomycete              | KC978028    | 7e-110  | Ascomycota | n              | Dothideomycetes | C                |
| priority_effects_CL_76   | 0.06                                                                      | 0.06              | 0.23                 | 0.06                 | -                    | -                  | -                | -                     | 0.10               | uncultured Ascomycete              | JX915540    | 4e-122  | Ascomycota | n              | n               | C                |
| priority_effects_CL_85   | -                                                                         | 0.19              | 0.06                 | 0.06                 | -                    | -                  | -                | -                     | 0.10               | <i>Calycina claroflava</i>         | KC412006    | 1e-106  | Ascomycota | Pezizomycotina | Leotiomycetes   | C                |
| priority_effects_CL_113  | 0.06                                                                      | -                 | -                    | 0.12                 | -                    | -                  | -                | -                     | 0.09               | <i>Meliniomyces</i> sp mh21992     | GQ996156    | 5e-121  | Ascomycota | n              | n               | C                |
| priority_effects_CL_170  | 0.06                                                                      | -                 | 0.06                 | -                    | 0.11                 | -                  | -                | -                     | 0.08               | unknown Boletales                  | NR103687    | 9e-134  | Ascomycota | n              | n               | C                |
| priority_effects_CL_189  | 0.06                                                                      | -                 | -                    | -                    | -                    | -                  | 0.08             | -                     | 0.07               | uncultured Ascomycete              | GU174433    | 1e-101  | Ascomycota | n              | n               | C                |
| priority_effects_CL_348  | -                                                                         | -                 | -                    | 0.06                 | -                    | -                  | 0.08             | -                     | 0.07               | <i>Lasiosphaeria hispida</i>       | JN942173    | 4e-87   | Ascomycota | Pezizomycotina | Sordariomycetes | C                |
| priority_effects_CL_183  | 0.06                                                                      | 0.06              | -                    | -                    | -                    | -                  | -                | -                     | 0.06               | <i>Helotiales</i> sp 220OA2013     | JX535161    | 2e-119  | Ascomycota | Pezizomycotina | Leotiomycetes   | C                |
| priority_effects_CL_322  | 0.06                                                                      | 0.06              | -                    | -                    | -                    | -                  | -                | -                     | 0.06               | <i>Lecythophora</i> sp olrim15     | AY781228    | 1e-97   | Ascomycota | Pezizomycotina | Sordariomycetes | C                |
| priority_effects_CL_122  | 0.06                                                                      | -                 | -                    | 0.06                 | -                    | -                  | -                | -                     | 0.06               | uncultured Ascomycete              | EF635808    | 2e-126  | Ascomycota | n              | n               | C                |
| priority_effects_CL_2260 | -                                                                         | 0.06              | 0.06                 | -                    | -                    | -                  | -                | -                     | 0.06               | <i>Plenodomus fluorescens</i>      | JF740229    | 2e-125  | Ascomycota | Pezizomycotina | Dothideomycetes | C                |
| priority_effects_CL_126  | 0.06                                                                      | -                 | 0.06                 | 0.06                 | -                    | -                  | -                | -                     | 0.06               | uncultured Ascomycete              | JF449882    | 5e-116  | Ascomycota | Pezizomycotina | Leotiomycetes   | C                |
| priority_effects_CL_218  | 0.06                                                                      | -                 | 0.06                 | -                    | -                    | -                  | -                | -                     | 0.06               | uncultured Ascomycete              | JF519259    | 1e-121  | Ascomycota | n              | n               | C                |
| priority_effects_CL_220  | 0.06                                                                      | -                 | 0.06                 | -                    | -                    | -                  | -                | -                     | 0.06               | uncultured Ascomycete              | JF449649    | 2e-114  | Ascomycota | Pezizomycotina | Leotiomycetes   | C                |
| priority_effects_CL_224  | 0.06                                                                      | -                 | 0.06                 | -                    | -                    | -                  | -                | -                     | 0.06               | uncultured Ascomycete              | KC753433    | 3e-123  | Ascomycota | Pezizomycotina | Dothideomycetes | C                |
| priority_effects_CL_212  | 0.06                                                                      | -                 | -                    | -                    | 0.11                 | 0.00               | -                | -                     | 0.06               | uncultured Ascomycete              | JN890098    | 9e-139  | Ascomycota | n              | n               | C                |
| priority_effects_CL_191  | -                                                                         | -                 | -                    | -                    | 1.46                 | -                  | -                | -                     | 1.46               | unknown fungus                     | KF212335    | 1e-126  | n          | n              | n               |                  |
| priority_effects_CL_26   | -                                                                         | 3.97              | -                    | 0.06                 | 1.01                 | -                  | 1.56             | 0.22                  | 1.36               | uncultured fungus                  | KC588610    | 8e-114  | n          | n              | n               |                  |
| priority_effects_CL_173  | -                                                                         | -                 | -                    | -                    | -                    | 1.26               | -                | -                     | 1.26               | uncultured fungus                  | KC588610    | 2e-89   | n          | n              | n               |                  |

| OTU ID no.               | Occurrence as % of total sequences occurring in each precoloniser species |                   |                      |                      |                      |                    |                  |                       | Average occurrence | Identification details     |             |         | Taxonomy |           |       | Functional group |
|--------------------------|---------------------------------------------------------------------------|-------------------|----------------------|----------------------|----------------------|--------------------|------------------|-----------------------|--------------------|----------------------------|-------------|---------|----------|-----------|-------|------------------|
|                          | Control                                                                   | <i>V.comedens</i> | <i>H. fragiforme</i> | <i>B. nummularia</i> | <i>T. versicolor</i> | <i>S. hirsutum</i> | <i>B. adusta</i> | <i>H. fasciculare</i> |                    | Taxon name                 | Accession # | E-value | Phylum   | Subphylum | Class |                  |
| priority_effects_CL_31   | -                                                                         | 0.19              | -                    | 0.06                 | 0.45                 | 5.20               | 0.23             | 0.22                  | 1.06               | uncultured fungus          | KC588610    | 1e-97   | n        | n         | n     |                  |
| priority_effects_CL_38   | 1.52                                                                      | -                 | -                    | -                    | 0.11                 | 0.14               | -                | -                     | 0.59               | uncultured fungus          | KC588633    | 1e-102  | n        | n         | n     |                  |
| priority_effects_CL_89   | 0.43                                                                      | 0.32              | -                    | -                    | -                    | -                  | 0.08             | 0.88                  | 0.42               | uncultured fungus          | AY704761    | 2e-100  | n        | n         | n     |                  |
| priority_effects_CL_347  | -                                                                         | -                 | 0.23                 | -                    | -                    | -                  | -                | -                     | 0.23               | uncultured fungus          | AJ875348    | 1e-12   | n        | n         | n     |                  |
| priority_effects_CL_2606 | -                                                                         | -                 | -                    | -                    | -                    | -                  | 0.16             | -                     | 0.16               | unknown fungus             | KF212281    | 1e-72   | n        | n         | n     |                  |
| priority_effects_CL_72   | -                                                                         | 0.06              | 0.06                 | -                    | 0.34                 | -                  | -                | -                     | 0.15               | uncultured ectomycorrhizal | JX042982    | 5e-136  | n        | n         | n     |                  |
| priority_effects_CL_118  | -                                                                         | 0.13              | -                    | -                    | -                    | -                  | -                | -                     | 0.13               | unknown                    | -           | -       | -        | -         | -     |                  |
| priority_effects_CL_161  | -                                                                         | 0.13              | -                    | -                    | -                    | -                  | -                | -                     | 0.13               | unknown                    | -           | -       | -        | -         | -     |                  |
| priority_effects_CL_244  | 0.12                                                                      | -                 | -                    | -                    | -                    | -                  | -                | -                     | 0.12               | uncultured fungus          | KC588633    | 2e-99   | n        | n         | n     |                  |
| priority_effects_CL_304  | 0.12                                                                      | -                 | -                    | -                    | -                    | -                  | -                | -                     | 0.12               | uncultured fungus          | KC588633    | 2e-104  | n        | n         | n     |                  |
