# Supplementary material for: Priority effects during fungal community establishment in beech wood
Source: PubMed Central journal article supplement (PMC4579477; doi:10.1038/ismej.2015.38), 2015-03-20
Supplement: ismej201538x9.pdf [file ismej201538x9.pdf]

**Supplementary Table 5.** Taxa recovered from different precoloniser species by reisolation and disk incubation. Each taxon is listed as a proportion of the total taxa recovered following each precoloniser species, and the overall occurrence of each taxon is shown. Named taxa were identified by ITS sequencing, and where pure culture or sequencing was not possible the taxa are described as groups of similar phenotype (G) or individuals (U), and their mycelial morphology described. The recovery method of each taxon refers to whether it was obtained through reisolation onto agar from wood (Reisol) or cords (Cords), or as outgrowth following disk incubation (Disk).

| Taxon name/code                                | Occurrence |         | Occurrence as proportion of total cOTUs following each precoloniser species |                    |                      |                      |                      |                    |                  |                       |                    |                     |        | Recovery method                                                              | Description | Accession number | Phylum |
|------------------------------------------------|------------|---------|-----------------------------------------------------------------------------|--------------------|----------------------|----------------------|----------------------|--------------------|------------------|-----------------------|--------------------|---------------------|--------|------------------------------------------------------------------------------|-------------|------------------|--------|
|                                                | No.        | % total | Control                                                                     | <i>V. comedens</i> | <i>H. fragiforme</i> | <i>B. nummularia</i> | <i>T. versicolor</i> | <i>S. hirsutum</i> | <i>B. adusta</i> | <i>H. fasciculare</i> | <i>P. velutina</i> | <i>P. impudicus</i> |        |                                                                              |             |                  |        |
| G 16                                           | 53         | 9.397   | 0.17                                                                        | 0.06               | 0.14                 | 0.13                 | -                    | 0.03               | 0.06             | -                     | -                  | 0.11                | Disk   | Matte black fluffy mycelium                                                  | -           | -                |        |
| <i>Hypocrea avellanea</i>                      | 39         | 6.915   | 0.04                                                                        | 0.23               | -                    | -                    | 0.05                 | 0.17               | 0.02             | -                     | 0.10               | 0.02                | Reisol | Fluffy white mycelium, white balls in older regions                          | UDB011502   | Basidiomycota    |        |
| <i>Phanerochaete</i>                           | 29         | 5.142   | 0.07                                                                        | 0.06               | 0.03                 | 0.03                 | 0.05                 | -                  | 0.10             | 0.05                  | -                  | 0.04                | Reisol | Yellow/orange fluffy mycelium and cords                                      | UDB017837   | Basidiomycota    |        |
| <i>Xenasmatella vaga</i>                       | 23         | 4.078   | 0.05                                                                        | 0.01               | 0.03                 | 0.06                 | -                    | 0.10               | 0.08             | -                     | -                  | 0.07                | Cords  | Bright yellow mat of cords with white edges                                  | UDB000519   | Basidiomycota    |        |
| G 35                                           | 19         | 3.369   | 0.03                                                                        | 0.03               | 0.05                 | -                    | 0.14                 | -                  | -                | -                     | 0.10               | -                   | Disk   | Green bobbly mycelium with lots of spores                                    | -           | -                |        |
| G 21                                           | 18         | 3.191   | 0.04                                                                        | 0.07               | 0.05                 | -                    | 0.02                 | 0.03               | -                | 0.05                  | -                  | -                   | Disk   | Orange spiny                                                                 | -           | -                |        |
| G 23                                           | 17         | 3.014   | -                                                                           | 0.05               | 0.03                 | 0.04                 | 0.05                 | -                  | 0.06             | -                     | -                  | 0.02                | Disk   | Yellow/orange fluffy mycelium and cords                                      | -           | -                |        |
| G 26                                           | 11         | 1.950   | 0.05                                                                        | 0.01               | -                    | 0.01                 | 0.02                 | -                  | 0.02             | -                     | -                  | 0.02                | Disk   | Yellow/orange fluffy mycelium with thick woolly cords                        | -           | -                |        |
| G 6                                            | 10         | 1.773   | -                                                                           | 0.02               | 0.03                 | 0.04                 | 0.02                 | -                  | -                | -                     | -                  | 0.04                | Disk   | Fine cream/white mycelium                                                    | -           | -                |        |
| <i>Parasola conopilus</i>                      | 10         | 1.773   | 0.02                                                                        | 0.04               | -                    | 0.01                 | 0.02                 | 0.03               | -                | -                     | -                  | 0.02                | Reisol | Butter yellow thick feathery cords                                           | UDB011851   | Basidiomycota    |        |
| G 4                                            | 8          | 1.418   | 0.01                                                                        | -                  | 0.03                 | 0.01                 | -                    | 0.03               | 0.02             | 0.05                  | -                  | 0.02                | Disk   | Dusty orange                                                                 | -           | -                |        |
| <i>Phlebia uda</i>                             | 8          | 1.418   | 0.07                                                                        | -                  | -                    | -                    | -                    | -                  | -                | -                     | -                  | -                   | Disk   | Bright yellow mycelial fans                                                  | AB084621    | Basidiomycota    |        |
| <i>Xenasmatella</i>                            | 8          | 1.418   | -                                                                           | 0.02               | 0.02                 | 0.01                 | 0.04                 | 0.07               | -                | -                     | -                  | -                   | Disk   | Orange felt-like mycelium with spiny haphazard cords                         | UDB000519   | Basidiomycota    |        |
| G 13                                           | 7          | 1.241   | -                                                                           | 0.01               | -                    | 0.01                 | 0.04                 | 0.03               | 0.02             | -                     | -                  | 0.02                | Reisol | Bright pink/yellow fluffy mycelium                                           | -           | -                |        |
| G 17                                           | 7          | 1.241   | 0.01                                                                        | 0.01               | 0.02                 | -                    | -                    | 0.03               | 0.06             | -                     | -                  | -                   | Disk   | Mustard yellow mycelium and cords                                            | -           | -                |        |
| G 33                                           | 7          | 1.241   | 0.06                                                                        | -                  | -                    | -                    | -                    | -                  | -                | -                     | -                  | -                   | Disk   | Thin white mycelium                                                          | -           | -                |        |
| G 8                                            | 7          | 1.241   | 0.03                                                                        | 0.01               | 0.02                 | -                    | -                    | -                  | 0.02             | -                     | -                  | -                   | Disk   | Fine white cords                                                             | -           | -                |        |
| <i>Absidia glauca</i>                          | 6          | 1.064   | -                                                                           | -                  | -                    | -                    | -                    | -                  | 0.10             | 0.05                  | -                  | -                   | Disk   | Antler-like cream protuberances                                              | -           | Ascomycota       |        |
| <i>Ceratocystis paradoxa</i>                   | 6          | 1.064   | -                                                                           | 0.01               | -                    | 0.01                 | -                    | -                  | 0.02             | -                     | -                  | 0.07                | Reisol | Slightly fluffy white mycelium with brown pig                                | KC305160    | Ascomycota       |        |
| G 1                                            | 6          | 1.064   | -                                                                           | 0.02               | 0.02                 | 0.01                 | -                    | -                  | -                | 0.10                  | -                  | -                   | Reisol | Brown/black fluffy fungus with white aerial                                  | JQ809674    | Ascomycota       |        |
| G 24                                           | 6          | 1.064   | 0.01                                                                        | 0.01               | -                    | -                    | 0.02                 | -                  | 0.02             | -                     | 0.10               | 0.02                | Disk   | Yellow/orange fluffy mycelium and cords, older regions pigmented dark orange | -           | -                |        |
| G 32                                           | 6          | 1.064   | -                                                                           | -                  | 0.03                 | -                    | -                    | 0.03               | 0.02             | -                     | 0.10               | 0.02                | Disk   | Thin glass-like cords                                                        | -           | -                |        |
| G 27                                           | 5          | 0.887   | 0.01                                                                        | -                  | -                    | -                    | -                    | 0.03               | 0.02             | -                     | -                  | 0.04                | Disk   | Tan thin haphazard cords                                                     | -           | -                |        |
| G 28                                           | 5          | 0.887   | 0.01                                                                        | -                  | -                    | -                    | 0.02                 | 0.03               | 0.02             | -                     | -                  | 0.02                | Disk   | Thick orange cords                                                           | -           | -                |        |
| <i>Hypholoma fasciculare</i>                   | 5          | 0.887   | -                                                                           | 0.01               | 0.02                 | -                    | 0.04                 | -                  | -                | 0.05                  | -                  | -                   | Reisol | Thick white cords                                                            | EU715657    | Ascomycota       |        |
| <i>Mortierella</i>                             | 5          | 0.887   | -                                                                           | -                  | -                    | 0.03                 | 0.04                 | -                  | -                | -                     | 0.10               | -                   | Reisol | Patchy white mycelium that seems to grow in waves                            | AY154690    | Ascomycota       |        |
| <i>Mortierella parvispora</i>                  | 5          | 0.887   | -                                                                           | -                  | 0.02                 | 0.03                 | -                    | -                  | -                | -                     | 0.10               | 0.02                | Reisol | Patchy white mycelium that seems to grow in waves                            | -           | Ascomycota       |        |
| <i>Scopuloides hydroides</i>                   | 5          | 0.887   | -                                                                           | -                  | 0.03                 | -                    | 0.02                 | -                  | -                | -                     | -                  | 0.04                | Reisol | Feathery yellow cords                                                        | UDB016378   | Basidiomycota    |        |
| <i>Fusarium lateritium</i>                     | 4          | 0.709   | -                                                                           | 0.02               | -                    | 0.01                 | 0.02                 | -                  | -                | -                     | -                  | -                   | Reisol | Bright pink/yellow fluffy mycelium                                           | JQ693397    | Ascomycota       |        |
| <i>Fusarium sp</i>                             | 4          | 0.709   | 0.01                                                                        | 0.01               | -                    | 0.01                 | -                    | -                  | -                | 0.05                  | -                  | -                   | Reisol | Bright pink fluffy mycelium                                                  | HQ630964    | Ascomycota       |        |
| G 11                                           | 4          | 0.709   | 0.02                                                                        | -                  | -                    | -                    | -                    | -                  | -                | -                     | -                  | 0.04                | Disk   | Flat white mycelium                                                          | -           | -                |        |
| G 3                                            | 4          | 0.709   | -                                                                           | 0.01               | -                    | 0.01                 | -                    | 0.03               | 0.02             | -                     | -                  | -                   | Disk   | Dense yellow/orange cords                                                    | -           | -                |        |
| G 34                                           | 4          | 0.709   | -                                                                           | 0.01               | -                    | -                    | 0.02                 | -                  | -                | 0.10                  | -                  | -                   | Disk   | Tough brown cords                                                            | -           | -                |        |
| G 37                                           | 4          | 0.709   | 0.01                                                                        | -                  | 0.03                 | 0.01                 | -                    | -                  | -                | -                     | -                  | -                   | Disk   | White mycelium and spores                                                    | -           | -                |        |
| G 38                                           | 4          | 0.709   | 0.01                                                                        | -                  | -                    | -                    | 0.04                 | -                  | 0.02             | -                     | -                  | -                   | Disk   | White spiny                                                                  | -           | -                |        |
| G 5                                            | 4          | 0.709   | -                                                                           | 0.01               | -                    | -                    | -                    | 0.03               | 0.02             | -                     | 0.10               | -                   | Disk   | Fine cream cords                                                             | -           | -                |        |
| G12                                            | 4          | 0.709   | 0.01                                                                        | 0.01               | -                    | 0.01                 | -                    | -                  | 0.02             | -                     | -                  | -                   | Disk   | Fluffy white mycelium                                                        | -           | -                |        |
| uncultured Basidiomycota <br><i>Clitopilus</i> | 4          | 0.709   | -                                                                           | -                  | -                    | -                    | 0.05                 | -                  | -                | -                     | -                  | 0.02                | Reisol | Fine lace-like white mycelium                                                | GU328568    | Basidiomycota    |        |

| Taxon name/code                                  | Occurrence |         | Occurrence as proportion of total cOTUs following each precoloniser species |                    |                      |                      |                      |                    |                  |                       |                    |                     | Recovery method | Description                                                      | Accession number | Phylum        |
|--------------------------------------------------|------------|---------|-----------------------------------------------------------------------------|--------------------|----------------------|----------------------|----------------------|--------------------|------------------|-----------------------|--------------------|---------------------|-----------------|------------------------------------------------------------------|------------------|---------------|
|                                                  | No.        | % total | Control                                                                     | <i>V. comedens</i> | <i>H. fragiforme</i> | <i>B. nummularia</i> | <i>T. versicolor</i> | <i>S. hirsutum</i> | <i>B. adusta</i> | <i>H. fasciculare</i> | <i>P. velutina</i> | <i>P. impudicus</i> |                 |                                                                  |                  |               |
| <i>Armillaria</i> -type cords                    | 3          | 0.532   | 0.01                                                                        | -                  | -                    | -                    | -                    | 0.03               | -                | -                     | -                  | 0.02                | Disk            | Thick brown rubbery/woody cords                                  | -                | Basidiomycota |
| G 18                                             | 3          | 0.532   | -                                                                           | -                  | -                    | -                    | -                    | -                  | 0.02             | -                     | -                  | 0.04                | Disk            | Orange bobbly mycelium                                           | -                | -             |
| G 19                                             | 3          | 0.532   | -                                                                           | -                  | 0.02                 | -                    | -                    | -                  | 0.02             | -                     | -                  | 0.02                | Disk            | Orange cords with lighter edges                                  | -                | -             |
| G 2                                              | 3          | 0.532   | -                                                                           | 0.01               | -                    | -                    | -                    | 0.07               | -                | -                     | -                  | -                   | Disk            | Clear cords like cobweb                                          | -                | -             |
| G 20                                             | 3          | 0.532   | 0.02                                                                        | -                  | -                    | -                    | -                    | -                  | -                | -                     | -                  | 0.02                | Disk            | Orange fluffy mycelium with thick cords                          | -                | -             |
| G 30                                             | 3          | 0.532   | -                                                                           | -                  | 0.03                 | -                    | -                    | 0.03               | -                | -                     | -                  | -                   | Disk            | Thick yellow cords                                               | -                | -             |
| G 36                                             | 3          | 0.532   | 0.01                                                                        | 0.01               | 0.02                 | -                    | -                    | -                  | -                | -                     | -                  | -                   | Disk            | Thick white rubbery mycelium                                     | -                | -             |
| <i>Helotiales</i> sp SGSF25                      | 3          | 0.532   | -                                                                           | 0.02               | -                    | -                    | -                    | 0.03               | -                | -                     | -                  | -                   | Reisol          | White fluffy edges with yellow pigmentation                      | KC581300         | Basidiomycota |
| <i>Mortierella</i> sp 12NJ01                     | 3          | 0.532   | -                                                                           | -                  | 0.03                 | -                    | -                    | -                  | -                | -                     | -                  | 0.02                | Reisol          | Patchy white mycelium that seems to grow in waves                | JX976049         | Ascomycota    |
| <i>Mycena galopus</i>                            | 3          | 0.532   | 0.01                                                                        | -                  | 0.02                 | -                    | 0.02                 | -                  | -                | -                     | -                  | -                   | Reisol          | Fine white mycelium and cords                                    | HM240534         | Basidiomycota |
| <i>Psathyrella candolleana</i>                   | 3          | 0.532   | 0.03                                                                        | -                  | -                    | -                    | -                    | -                  | -                | -                     | -                  | -                   | Disk            | Cream fluffy mycelium                                            | EU520251         | Basidiomycota |
| uncultured fungus Leotiomyces                    | 3          | 0.532   | -                                                                           | -                  | 0.02                 | -                    | -                    | 0.02               | -                | -                     | -                  | -                   | Reisol          | Grey/brown fluffy mycelium                                       | -                | Ascomycota    |
| uncultured <i>Fusarium</i>                       | 3          | 0.532   | -                                                                           | 0.01               | -                    | 0.01                 | 0.02                 | -                  | -                | -                     | -                  | -                   | Reisol          | Fluffy white mycelium with peach/orange pigmentation in centre   | KF385354         | Ascomycota    |
| Agaricomycetes – <i>P. vaga</i>                  | 2          | 0.355   | -                                                                           | -                  | -                    | -                    | -                    | -                  | 0.04             | -                     | -                  | -                   | Reisol          | Cream fluffy mycelium and cords                                  | UDB018605        | Basidiomycota |
| <i>Botryotinia</i> sp FQ 4 1                     | 2          | 0.355   | -                                                                           | -                  | -                    | 0.01                 | -                    | -                  | -                | 0.05                  | -                  | -                   | Reisol          | Green/grey mycelium surrounded by vivid yellow pigmentation      | KF438015         | Ascomycota    |
| <i>Diplodia mutila</i>                           | 2          | 0.355   | -                                                                           | -                  | 0.02                 | 0.01                 | -                    | -                  | -                | -                     | -                  | -                   | Reisol          | Black/grey pigmented with fluffy white aerial mycelium           | KF225531         | Ascomycota    |
| <i>Dothiorella iberica</i>                       | 2          | 0.355   | -                                                                           | -                  | 0.02                 | 0.01                 | -                    | -                  | -                | -                     | -                  | -                   | Reisol          | Green/grey with pigment in agar and bright white aerial mycelium | JQ411407         | Ascomycota    |
| <i>Epicoccum</i> sp 629 AI 2013                  | 2          | 0.355   | -                                                                           | -                  | -                    | -                    | 0.02                 | -                  | 0.02             | -                     | -                  | -                   | Reisol          | Dark orange/red/brown, highly pigmented                          | KC662229         | Ascomycota    |
| fungus sp APA 2013                               | 2          | 0.355   | -                                                                           | -                  | -                    | 0.01                 | -                    | 0.03               | -                | -                     | -                  | -                   | Reisol          | Light pink fluffy mycelium                                       | KF212335         | Ascomycota    |
| G 10                                             | 2          | 0.355   | -                                                                           | -                  | -                    | -                    | 0.02                 | -                  | -                | -                     | 0.10               | -                   | Disk            | Flat grey mycelium                                               | -                | -             |
| G 14                                             | 2          | 0.355   | -                                                                           | -                  | -                    | -                    | -                    | -                  | -                | 0.10                  | -                  | -                   | Reisol          | Grey patchy mycelium                                             | -                | -             |
| G 15                                             | 2          | 0.355   | -                                                                           | -                  | -                    | 0.03                 | -                    | -                  | -                | -                     | -                  | -                   | Disk            | Matte yellow dense cords                                         | -                | -             |
| G 22                                             | 2          | 0.355   | -                                                                           | 0.01               | -                    | -                    | 0.02                 | -                  | -                | -                     | -                  | -                   | Disk            | Peach spiny cords                                                | -                | -             |
| G 25                                             | 2          | 0.355   | 0.01                                                                        | 0.01               | -                    | -                    | -                    | -                  | -                | -                     | -                  | -                   | Disk            | Yellow/orange fluffy mycelium with thin white cords              | -                | -             |
| G 29                                             | 2          | 0.355   | -                                                                           | -                  | -                    | -                    | -                    | -                  | 0.10             | -                     | -                  | -                   | Disk            | Yellow leathery cords                                            | -                | -             |
| G 31                                             | 2          | 0.355   | -                                                                           | -                  | -                    | -                    | -                    | -                  | 0.02             | -                     | 0.10               | -                   | Disk            | Thin dense white cords                                           | -                | -             |
| G 7                                              | 2          | 0.355   | 0.01                                                                        | -                  | -                    | 0.01                 | -                    | -                  | -                | -                     | -                  | -                   | Reisol          | Fine white fluffy mycelium                                       | -                | -             |
| G 9                                              | 2          | 0.355   | 0.01                                                                        | 0.01               | -                    | -                    | -                    | -                  | -                | -                     | -                  | -                   | Disk            | Fine yellow cords                                                | -                | -             |
| <i>Hypocrea pachybasioides</i>                   | 2          | 0.355   | -                                                                           | 0.01               | -                    | 0.01                 | -                    | -                  | -                | -                     | -                  | -                   | Reisol          | White mycelium, fan-like growth                                  | FJ860789         | Ascomycota    |
| <i>Hypoxylon serpens</i>                         | 2          | 0.355   | -                                                                           | -                  | 0.02                 | 0.01                 | -                    | -                  | -                | -                     | -                  | -                   | Reisol          | Green/brown pigmented mycelium                                   | JN979420         | Ascomycota    |
| <i>Parasola/Phlebia</i>                          | 2          | 0.355   | 0.01                                                                        | -                  | -                    | -                    | -                    | 0.03               | -                | -                     | -                  | -                   | Disk            | Butter yellow thick feathery cords                               | -                | Basidiomycota |
| <i>Phoma eupyrena</i>                            | 2          | 0.355   | -                                                                           | -                  | -                    | -                    | 0.04                 | -                  | -                | -                     | -                  | -                   | Reisol          | Dark grey with craggy light grey aerial mycel                    | HQ115670         | Ascomycota    |
| <i>Phoma</i> sp NF H                             | 2          | 0.355   | 0.01                                                                        | -                  | -                    | -                    | -                    | -                  | 0.05             | -                     | -                  | -                   | Disk            | -                                                                | JX160059         | Ascomycota    |
| <i>Sarocladium strictum</i>                      | 2          | 0.355   | 0.01                                                                        | -                  | -                    | 0.01                 | -                    | -                  | -                | -                     | -                  | -                   | Reisol          | Grey/brown grainy mycelium                                       | KF675771         | Ascomycota    |
| U21                                              | 2          | 0.355   | -                                                                           | -                  | -                    | 0.03                 | -                    | -                  | -                | -                     | -                  | -                   | Disk            | Fluffy matte yellow mycelium                                     | -                | -             |
| uncultured <i>Bionectria</i>   <i>Bionectria</i> | 2          | 0.355   | -                                                                           | -                  | 0.03                 | -                    | -                    | -                  | -                | -                     | -                  | -                   | Reisol          | Orange/brown with lots of white aerial mycel                     | JF449885         | Ascomycota    |
| uncultured fungus  <i>Mycena</i>                 | 2          | 0.355   | -                                                                           | -                  | -                    | 0.01                 | -                    | -                  | -                | -                     | -                  | 0.02                | Reisol          | White mycelium with spiral margins                               | DQ309097         | Basidiomycota |
| uncultured <i>Phoma</i>                          | 2          | 0.355   | -                                                                           | 0.01               | 0.02                 | -                    | -                    | -                  | -                | -                     | -                  | -                   | Reisol          | Grey with fluffy white aerial mycelium                           | EU852354         | Ascomycota    |
| Agaricomycetes                                   | 1          | 0.177   | -                                                                           | -                  | -                    | -                    | -                    | -                  | 0.02             | -                     | -                  | -                   | Cords           | Fluffy white mycelium                                            | UDB018605        | Basidiomycota |
| <i>Arthrinium arundinis</i>                      | 1          | 0.177   | -                                                                           | 0.01               | -                    | -                    | -                    | -                  | -                | -                     | -                  | -                   | Reisol          | Cream fluffy mycelium                                            | KF144889         | Ascomycota    |
| <i>Ascocoryne sarcooides</i>                     | 1          | 0.177   | 0.01                                                                        | -                  | -                    | -                    | -                    | -                  | -                | -                     | -                  | -                   | Reisol          | Mulberry mycelium with halo of small colonies                    | HM152550         | Ascomycota    |
| <i>Cristinia helvetica</i>                       | 1          | 0.177   | -                                                                           | 0.01               | -                    | -                    | -                    | -                  | -                | -                     | -                  | -                   | Reisol          | -                                                                | UDB016420        | Basidiomycota |
| fungus endophyte                                 | 1          | 0.177   | -                                                                           | 0.01               | -                    | -                    | -                    | -                  | -                | -                     | -                  | -                   | Reisol          | Cream fluffy with bright orange aerial mycelium                  | KF435168         | -             |

| Taxon name/code                        | Occurrence |         | Occurrence as proportion of total cOTUs following each precoloniser species |                    |                      |                      |                      |                    |                  |                       |                    |                     | Recovery method | Description                                                               | Accession number | Phylum        |
|----------------------------------------|------------|---------|-----------------------------------------------------------------------------|--------------------|----------------------|----------------------|----------------------|--------------------|------------------|-----------------------|--------------------|---------------------|-----------------|---------------------------------------------------------------------------|------------------|---------------|
|                                        | No.        | % total | Control                                                                     | <i>V. comedens</i> | <i>H. fragiforme</i> | <i>B. nummularia</i> | <i>T. versicolor</i> | <i>S. hirsutum</i> | <i>B. adusta</i> | <i>H. fasciculare</i> | <i>P. velutina</i> | <i>P. impudicus</i> |                 |                                                                           |                  |               |
| fungus sp F12 Mortierella              | 1          | 0.177   | -                                                                           | -                  | -                    | -                    | -                    | -                  | -                | -                     | 0.10               | -                   | Reisol          | Dense white with orange/brown centre                                      | EU725674         | Ascomycota    |
| fungus sp NLEndoHerit 016 2008N1 28 3E | 1          | 0.177   | -                                                                           | 0.01               | -                    | -                    | -                    | -                  | -                | -                     | -                  | -                   | Reisol          | White flat mycelium with concentric zones of clearing around the inoculum | JX978245         | -             |
| <i>Gibberella zeae</i>                 | 1          | 0.177   | -                                                                           | -                  | -                    | 0.01                 | -                    | -                  | -                | -                     | -                  | -                   | Reisol          | Bright pink/yellow fluffy mycelium                                        | -                | -             |
| <i>Gymnopus peronatus</i>              | 1          | 0.177   | -                                                                           | -                  | 0.02                 | -                    | -                    | -                  | -                | -                     | -                  | -                   | Disk            | -                                                                         | HQ333195         | Ascomycota    |
| <i>Hypocrea koningii</i>               | 1          | 0.177   | -                                                                           | -                  | -                    | 0.01                 | -                    | -                  | -                | -                     | -                  | -                   | Reisol          | Fluffy white mycelium                                                     | UDB011029        | Ascomycota    |
| <i>Hypocrea lixii</i>                  | 1          | 0.177   | -                                                                           | -                  | -                    | -                    | -                    | 0.02               | -                | -                     | -                  | -                   | Disk            | Fluffy yellow mycelium with clumped cords at edges                        | X93984           | Ascomycota    |
| <i>Hypocrea neorufoides</i>            | 1          | 0.177   | -                                                                           | -                  | -                    | -                    | -                    | 0.02               | -                | -                     | -                  | -                   | Reisol          | Yellow/cream fluffy mycelium, pigmented bro                               | U78881           | Ascomycota    |
| <i>Hypocrea viridescens</i>            | 1          | 0.177   | 0.01                                                                        | -                  | -                    | -                    | -                    | -                  | -                | -                     | -                  | -                   | Reisol          | Cream fluffy mycelium                                                     | GU062213         | Ascomycota    |
| <i>Hypoxylon fragiforme</i>            | 1          | 0.177   | -                                                                           | -                  | -                    | -                    | -                    | -                  | 0.05             | -                     | -                  | -                   | Reisol          | Dark green/brown hard balls                                               | GU566274         | Ascomycota    |
| <i>Ilyonectria radicialcola</i>        | 1          | 0.177   | -                                                                           | -                  | 0.02                 | -                    | -                    | -                  | -                | -                     | -                  | -                   | Reisol          | Fine white mycelium with green/brown spores                               | HM036598         | Ascomycota    |
| <i>Lewia infectaria</i>                | 1          | 0.177   | -                                                                           | -                  | -                    | 0.01                 | -                    | -                  | -                | -                     | -                  | -                   | Disk            | -                                                                         | KC292865         | Ascomycota    |
| <i>Mortierella sp WD2G</i>             | 1          | 0.177   | -                                                                           | -                  | -                    | -                    | -                    | -                  | 0.05             | -                     | -                  | -                   | Disk            | -                                                                         | JX270447         | Ascomycota    |
| <i>Mucor genevensis</i>                | 1          | 0.177   | -                                                                           | -                  | 0.02                 | -                    | -                    | -                  | -                | -                     | -                  | -                   | Reisol          | Fine white mycelium with green/brown spores                               | EU484296         | Ascomycota    |
| <i>Mycena citrinomarginata</i>         | 1          | 0.177   | -                                                                           | -                  | -                    | -                    | -                    | -                  | -                | -                     | -                  | 0.02                | Disk            | -                                                                         | JF908416         | Basidiomycota |
| <i>Mycena sp MCVE 997</i>              | 1          | 0.177   | -                                                                           | -                  | -                    | -                    | 0.02                 | -                  | -                | -                     | -                  | -                   | Disk            | Yellow/white mycelium                                                     | JF908495         | Basidiomycota |
| <i>Nectria nigrescens</i>              | 1          | 0.177   | -                                                                           | 0.01               | -                    | -                    | -                    | -                  | -                | -                     | -                  | -                   | Reisol          | -                                                                         | HM484550         | Ascomycota    |
| <i>Nemania serpens</i>                 | 1          | 0.177   | -                                                                           | -                  | -                    | 0.01                 | -                    | -                  | -                | -                     | -                  | -                   | Reisol          | -                                                                         | HQ115648         | Ascomycota    |
| <i>Neonectria sp.</i>                  | 1          | 0.177   | -                                                                           | -                  | -                    | -                    | -                    | -                  | -                | -                     | -                  | 0.02                | Reisol          | Patchy white mycelium with grey spores in older regions                   | KC758704         | Ascomycota    |
| <i>Phialocephala dimorphospora</i>     | 1          | 0.177   | -                                                                           | -                  | -                    | -                    | 0.02                 | -                  | -                | -                     | -                  | -                   | Reisol          | Bright yellow flat mycelium                                               | AY606309         | Ascomycota    |
| <i>Rhinocladiella similis</i>          | 1          | 0.177   | -                                                                           | -                  | 0.02                 | -                    | -                    | -                  | -                | -                     | -                  | -                   | Reisol          | -                                                                         | KC254071         | Ascomycota    |
| soil fungal sp ANG28                   | 1          | 0.177   | -                                                                           | -                  | -                    | 0.01                 | -                    | -                  | -                | -                     | -                  | -                   | Reisol          | Grey fluffy mycelium                                                      | DQ914420         | -             |
| <i>Trichoderma viridarium</i>          | 1          | 0.177   | -                                                                           | 0.01               | -                    | -                    | -                    | -                  | -                | -                     | -                  | -                   | Reisol          | Green bobbly mycelium with lots of spores                                 | X93987           | Ascomycota    |
| U1                                     | 1          | 0.177   | 0.01                                                                        | -                  | -                    | -                    | -                    | -                  | -                | -                     | -                  | -                   | Disk            | Bright orange mycelium                                                    | -                | -             |
| U10                                    | 1          | 0.177   | -                                                                           | -                  | 0.02                 | -                    | -                    | -                  | -                | -                     | -                  | -                   | Disk            | Cream mycelium                                                            | -                | -             |
| U11                                    | 1          | 0.177   | -                                                                           | 0.01               | -                    | -                    | -                    | -                  | -                | -                     | -                  | -                   | Disk            | Cream spiny cords                                                         | -                | -             |
| U12                                    | 1          | 0.177   | 0.01                                                                        | -                  | -                    | -                    | -                    | -                  | -                | -                     | -                  | -                   | Disk            | Cream/brown balls                                                         | -                | -             |
| U13                                    | 1          | 0.177   | -                                                                           | -                  | -                    | -                    | -                    | -                  | -                | -                     | -                  | 0.02                | Disk            | Dark orange mycelium with yellow cords                                    | -                | -             |
| U14                                    | 1          | 0.177   | 0.01                                                                        | -                  | -                    | -                    | -                    | -                  | -                | -                     | -                  | -                   | Disk            | Fine white aerial mycelium                                                | -                | -             |
| U15                                    | 1          | 0.177   | -                                                                           | -                  | -                    | -                    | 0.02                 | -                  | -                | -                     | -                  | -                   | Reisol          | Fine, feathery white mycelium                                             | -                | -             |
| U16                                    | 1          | 0.177   | 0.01                                                                        | -                  | -                    | -                    | -                    | -                  | -                | -                     | -                  | -                   | Reisol          | Flat cream mycelium with fine cords                                       | -                | -             |
| U17                                    | 1          | 0.177   | -                                                                           | -                  | -                    | 0.01                 | -                    | -                  | -                | -                     | -                  | -                   | Reisol          | Flat white mycelium with orange pigmentation                              | -                | -             |
| U18                                    | 1          | 0.177   | -                                                                           | -                  | -                    | 0.01                 | -                    | -                  | -                | -                     | -                  | -                   | Reisol          | Flat white mycelium, slightly pigmented                                   | -                | -             |
| U19                                    | 1          | 0.177   | -                                                                           | -                  | -                    | -                    | -                    | -                  | -                | -                     | -                  | 0.02                | Reisol          | Fluffy brown mycelium                                                     | -                | -             |
| U2                                     | 1          | 0.177   | 0.01                                                                        | -                  | -                    | -                    | -                    | -                  | -                | -                     | -                  | -                   | Disk            | Black bobbly mycelium                                                     | -                | -             |
| U20                                    | 1          | 0.177   | -                                                                           | -                  | -                    | -                    | -                    | 0.02               | -                | -                     | -                  | -                   | Disk            | Fluffy grey mycelium                                                      | -                | -             |
| U22                                    | 1          | 0.177   | 0.01                                                                        | -                  | -                    | -                    | -                    | -                  | -                | -                     | -                  | -                   | Disk            | Fluffy white mycelium with orange spines                                  | -                | -             |
| U23                                    | 1          | 0.177   | 0.01                                                                        | -                  | -                    | -                    | -                    | -                  | -                | -                     | -                  | -                   | Disk            | Fluffy yellow/white mycelium                                              | -                | -             |
| U24                                    | 1          | 0.177   | -                                                                           | -                  | -                    | 0.01                 | -                    | -                  | -                | -                     | -                  | -                   | Reisol          | Green/black with lots of aerial mycelium                                  | -                | -             |
| U25                                    | 1          | 0.177   | -                                                                           | -                  | 0.02                 | -                    | -                    | -                  | -                | -                     | -                  | -                   | Reisol          | Grey fluffy mycelium with lots of spores                                  | -                | -             |
| U26                                    | 1          | 0.177   | -                                                                           | 0.01               | -                    | -                    | -                    | -                  | -                | -                     | -                  | -                   | Disk            | Light grey spores                                                         | -                | -             |
| U27                                    | 1          | 0.177   | -                                                                           | -                  | -                    | -                    | -                    | -                  | 0.05             | -                     | -                  | -                   | Disk            | Light orange mycelium with spores                                         | -                | -             |
| U28                                    | 1          | 0.177   | -                                                                           | -                  | -                    | -                    | 0.02                 | -                  | -                | -                     | -                  | -                   | Disk            | Matte orange mycelium with yellow cords                                   | -                | -             |
| U3                                     | 1          | 0.177   | -                                                                           | -                  | -                    | -                    | -                    | -                  | -                | -                     | -                  | 0.02                | Disk            | Black velvety mycelium                                                    | -                | -             |
| U30                                    | 1          | 0.177   | -                                                                           | -                  | -                    | -                    | -                    | -                  | -                | -                     | -                  | 0.02                | Disk            | Orange mycelium with spores                                               | -                | -             |
| U31                                    | 1          | 0.177   | 0.01                                                                        | -                  | -                    | -                    | -                    | -                  | -                | -                     | -                  | -                   | Reisol          | Orange mycelium with white fluffy edges                                   | -                | -             |
| U32                                    | 1          | 0.177   | 0.01                                                                        | -                  | -                    | -                    | -                    | -                  | -                | -                     | -                  | -                   | Disk            | Orange/yellow fluffy mycelium                                             | -                | -             |
| U33                                    | 1          | 0.177   | -                                                                           | -                  | -                    | -                    | 0.02                 | -                  | -                | -                     | -                  | -                   | Disk            | Orange/yellow rubbery flat mycelium                                       | -                | -             |
| U34                                    | 1          | 0.177   | -                                                                           | -                  | 0.02                 | -                    | -                    | -                  | -                | -                     | -                  | -                   | Disk            | Orange/yellow thick cords                                                 | -                | -             |

| Taxon name/code                 | Occurrence |                  | Occurrence as proportion of total cOTUs following each precoloniser species |                    |                      |                      |                      |                    |                  |                       |                    |                     | Recovery method | Description                                          | Accession number | Phylum        |
|---------------------------------|------------|------------------|-----------------------------------------------------------------------------|--------------------|----------------------|----------------------|----------------------|--------------------|------------------|-----------------------|--------------------|---------------------|-----------------|------------------------------------------------------|------------------|---------------|
|                                 | No.        | % total          | Control                                                                     | <i>V. comedens</i> | <i>H. fragiforme</i> | <i>B. nummularia</i> | <i>T. versicolor</i> | <i>S. hirsutum</i> | <i>B. adusta</i> | <i>H. fasciculare</i> | <i>P. velutina</i> | <i>P. impudicus</i> |                 |                                                      |                  |               |
| U35                             | 1          | 0.177            | -                                                                           | -                  | -                    | -                    | 0.02                 | -                  | -                | -                     | -                  | -                   | Disk            | Pale pink and green mycelium with spores             | -                | -             |
| U36                             | 1          | 0.177            | 0.01                                                                        | -                  | -                    | -                    | -                    | -                  | -                | -                     | -                  | -                   | Disk            | Pale yellow fluffy mycelium                          | -                | -             |
| U37                             | 1          | 0.177            | -                                                                           | 0.01               | -                    | -                    | -                    | -                  | -                | -                     | -                  | -                   | Reisol          | Penicillium-type                                     | -                | -             |
| U38                             | 1          | 0.177            | -                                                                           | -                  | -                    | 0.01                 | -                    | -                  | -                | -                     | -                  | -                   | Reisol          | Pink/orange mycelium with green spores               | -                | -             |
| U39                             | 1          | 0.177            | -                                                                           | -                  | -                    | -                    | 0.02                 | -                  | -                | -                     | -                  | -                   | Reisol          | Red mycelium                                         | -                | -             |
| U4                              | 1          | 0.177            | -                                                                           | -                  | -                    | 0.01                 | -                    | -                  | -                | -                     | -                  | -                   | Disk            | Bright orange zone lines and pimentation             | -                | -             |
| U40                             | 1          | 0.177            | -                                                                           | -                  | 0.02                 | -                    | -                    | -                  | -                | -                     | -                  | -                   | Disk            | Rust-coloured, patchy mycelium                       | -                | -             |
| U41                             | 1          | 0.177            | -                                                                           | -                  | -                    | 0.01                 | -                    | -                  | -                | -                     | -                  | -                   | Disk            | Thick cream mycelium                                 | -                | -             |
| U42                             | 1          | 0.177            | 0.01                                                                        | -                  | -                    | -                    | -                    | -                  | -                | -                     | -                  | -                   | Disk            | Thick white bobbly mycelium                          | -                | -             |
| U43                             | 1          | 0.177            | 0.01                                                                        | -                  | -                    | -                    | -                    | -                  | -                | -                     | -                  | -                   | Disk            | Transparent fluffy mycelium                          | -                | -             |
| U44                             | 1          | 0.177            | -                                                                           | -                  | -                    | -                    | 0.02                 | -                  | -                | -                     | -                  | -                   | Reisol          | Transparent, flat mycelium                           | -                | -             |
| U45                             | 1          | 0.177            | -                                                                           | -                  | -                    | 0.01                 | -                    | -                  | -                | -                     | -                  | -                   | Disk            | White /green fan-like mycelium                       | -                | -             |
| U46                             | 1          | 0.177            | 0.01                                                                        | -                  | -                    | -                    | -                    | -                  | -                | -                     | -                  | -                   | Disk            | White and orange cords                               | -                | -             |
| U47                             | 1          | 0.177            | -                                                                           | -                  | 0.02                 | -                    | -                    | -                  | -                | -                     | -                  | -                   | Disk            | White cords like cobweb                              | -                | -             |
| U48                             | 1          | 0.177            | -                                                                           | -                  | -                    | -                    | -                    | 0.03               | -                | -                     | -                  | -                   | Disk            | White feathery cords                                 | -                | -             |
| U49                             | 1          | 0.177            | -                                                                           | -                  | -                    | -                    | 0.02                 | -                  | -                | -                     | -                  | -                   | Disk            | White feathery cords, orange pigmentation            | -                | -             |
| U5                              | 1          | 0.177            | -                                                                           | -                  | -                    | 0.01                 | -                    | -                  | -                | -                     | -                  | -                   | Reisol          | Bright yellow/green fluffy mycelium                  | -                | -             |
| U50                             | 1          | 0.177            | -                                                                           | 0.01               | -                    | -                    | -                    | -                  | -                | -                     | -                  | -                   | Reisol          | White flat mycelium                                  | -                | -             |
| U51                             | 1          | 0.177            | -                                                                           | -                  | -                    | -                    | -                    | -                  | -                | -                     | -                  | 0.02                | Disk            | White mycelium with yellow cords                     | -                | -             |
| U52                             | 1          | 0.177            | 0.01                                                                        | -                  | -                    | -                    | -                    | -                  | -                | -                     | -                  | -                   | Disk            | White/cream mycelium in column through disk          | -                | -             |
| U53                             | 1          | 0.177            | -                                                                           | -                  | 0.02                 | -                    | -                    | -                  | -                | -                     | -                  | -                   | Disk            | Woolly cream mycelium                                | -                | -             |
| U54                             | 1          | 0.177            | -                                                                           | 0.01               | -                    | -                    | -                    | -                  | -                | -                     | -                  | -                   | Disk            | Yellow mycelium with spores                          | -                | -             |
| U55                             | 1          | 0.177            | 0.01                                                                        | -                  | -                    | -                    | -                    | -                  | -                | -                     | -                  | -                   | Disk            | Yellow spiny cords                                   | -                | -             |
| U56                             | 1          | 0.177            | -                                                                           | -                  | -                    | -                    | 0.02                 | -                  | -                | -                     | -                  | -                   | Reisol          | Yellow thick mycelium                                | -                | -             |
| U57                             | 1          | 0.177            | -                                                                           | -                  | -                    | -                    | -                    | 0.02               | -                | -                     | -                  | -                   | Reisol          | Yellow-edged, brown centred cords                    | -                | -             |
| U58                             | 1          | 0.177            | -                                                                           | -                  | 0.02                 | -                    | -                    | -                  | -                | -                     | -                  | -                   | Reisol          | Yellow/cream mycelium                                | -                | -             |
| U59                             | 1          | 0.177            | -                                                                           | -                  | -                    | -                    | -                    | -                  | 0.05             | -                     | -                  | -                   | Disk            | Yellow/orange cords with lighter yellow edge         | -                | -             |
| U6                              | 1          | 0.177            | -                                                                           | 0.01               | -                    | -                    | -                    | -                  | -                | -                     | -                  | -                   | Disk            | Cream and orange cords                               | -                | -             |
| U60                             | 1          | 0.177            | -                                                                           | -                  | -                    | 0.01                 | -                    | -                  | -                | -                     | -                  | -                   | Disk            | Yellow/orange haphazard cords                        | -                | -             |
| U61                             | 1          | 0.177            | -                                                                           | -                  | 0.02                 | -                    | -                    | -                  | -                | -                     | -                  | -                   | Disk            | Yellow/orange mycelium in column through d           | -                | -             |
| U7                              | 1          | 0.177            | 0.01                                                                        | -                  | -                    | -                    | -                    | -                  | -                | -                     | -                  | -                   | Reisol          | Cream bobbly mycelium                                | -                | -             |
| U8                              | 1          | 0.177            | -                                                                           | -                  | -                    | 0.01                 | -                    | -                  | -                | -                     | -                  | -                   | Disk            | Cream cords with yellow edges                        | -                | -             |
| U9                              | 1          | 0.177            | 0.01                                                                        | -                  | -                    | -                    | -                    | -                  | -                | -                     | -                  | -                   | Disk            | Cream cords, highly branched                         | -                | -             |
| uncultured Agaricaceae          | 1          | 0.177            | -                                                                           | -                  | 0.02                 | -                    | -                    | -                  | -                | -                     | -                  | -                   | Disk            | -                                                    | AM076650         | Basidiomycota |
| uncultured Arthrimum            | 1          | 0.177            | -                                                                           | -                  | -                    | -                    | -                    | 0.02               | -                | -                     | -                  | -                   | Reisol          | White aerial mycelium with antler-like protuberances | KF385288         | Ascomycota    |
| uncultured endophytic fungus    | 1          | 0.177            | -                                                                           | -                  | -                    | -                    | -                    | 0.02               | -                | -                     | -                  | -                   | Cords           | Brigh orange fluffy mycelium, highly pigmented       | EF505343         | -             |
| uncultured fungus Mortierella   | 1          | 0.177            | -                                                                           | -                  | -                    | 0.01                 | -                    | -                  | -                | -                     | -                  | -                   | Reisol          | -                                                    | JX316324         | Ascomycota    |
| uncultured fungus Umbelopsis    | 1          | 0.177            | -                                                                           | -                  | -                    | 0.01                 | -                    | -                  | -                | -                     | -                  | -                   | Reisol          | -                                                    | EF434088         | Ascomycota    |
| uncultured Melanopsammella      | 1          | 0.177            | -                                                                           | -                  | -                    | -                    | -                    | -                  | 0.02             | -                     | -                  | -                   | Disk            | -                                                    | JF519556         | Ascomycota    |
| uncultured Mucorales Umbelopsis | 1          | 0.177            | -                                                                           | -                  | 0.02                 | -                    | -                    | -                  | -                | -                     | -                  | -                   | Reisol          | Flat dense white mycelium, puckered in centre        | JF691265         | Ascomycota    |
| uncultured Trichoderma          | 1          | 0.177            | -                                                                           | 0.01               | -                    | -                    | -                    | -                  | -                | -                     | -                  | -                   | Reisol          | -                                                    | JF519023         | Ascomycota    |
|                                 |            | Number of OTUs   | 51                                                                          | 46                 | 42                   | 48                   | 36                   | 21                 | 34               | 16                    | 10                 | 32                  |                 |                                                      |                  |               |
|                                 |            | Number of counts | 119                                                                         | 98                 | 65                   | 68                   | 57                   | 29                 | 52               | 20                    | 10                 | 46                  |                 |                                                      |                  |               |
