# Supplementary material for: Priority effects during fungal community establishment in beech wood
Source: PubMed Central journal article supplement (PMC4579477; doi:10.1038/ismej.2015.38), 2015-03-20
Supplement: ismej201538x10.pdf [file ismej201538x10.pdf]

**Supplementary Table 6.** OTUs responsible for the top 50% variability between precoloniser species. Pairwise comparisons were performed using Adonis/PERMANOVA, following which a P-adjustment was performed to reduce the effect of false discovery rates (Benjamini and Holden 1995); adjusted P-values are shown. "\*" indicates a significant difference in community composition (P<0.05). Adonis-Simper tests were conducted to determine which OTUs were responsible for 50% of the variability between pairwise community profiles.

| Pairwise comparison                       | Adonis outcomes |       |         | Adonissimper results OTU ID |          |      |       |              |              |                      |          | OTU ID                             | Identification | Taxonomy |
|-------------------------------------------|-----------------|-------|---------|-----------------------------|----------|------|-------|--------------|--------------|----------------------|----------|------------------------------------|----------------|----------|
|                                           | df              | F     | P (adj) | No. OTUs                    | Contrast | SD   | Ratio | Av. % A OTUs | Av. % B OTUs | Cumulative variation |          |                                    |                |          |
| Control – <i>V. comedens</i>              | 16              | 2.510 | 0.014 * | 6                           | 0.15     | 0.19 | 0.78  | 54.75        | 2.11         | 0.15                 | scata_0  | <i>Lasiosphaeris hispida</i>       | Ascomycota     |          |
|                                           |                 |       |         |                             | 0.09     | 0.17 | 0.51  | 18.38        | 19.89        | 0.25                 | scata_9  | <i>Coprinellus impatiens</i>       | Basidiomycota  |          |
|                                           |                 |       |         |                             | 0.08     | 0.14 | 0.58  | 0.50         | 32.44        | 0.33                 | scata_3  | <i>Helotiales</i> sp SGGf25        | Ascomycota     |          |
|                                           |                 |       |         |                             | 0.07     | 0.12 | 0.64  | 9.13         | 22.78        | 0.41                 | scata_4  | <i>Xenasmattella vaga</i>          | Basidiomycota  |          |
|                                           |                 |       |         |                             | 0.05     | 0.04 | 1.23  | 20.25        | 0.78         | 0.46                 | Scata_2  | uncultured <i>Ascomycete</i>       | Ascomycota     |          |
|                                           |                 |       |         |                             | 0.05     | 0.08 | 0.65  | 0.13         | 19.67        | 0.52                 | scata_17 | <i>Hypocrea pachybasioides</i>     | Ascomycota     |          |
| Control – <i>H. fragiforme</i>            | 16              | 0.840 | 0.654   | 6                           | 0.16     | 0.17 | 0.97  | 54.75        | 36.22        | 0.19                 | scata_0  | <i>Lasiosphaeris hispida</i>       | Ascomycota     |          |
|                                           |                 |       |         |                             | 0.08     | 0.09 | 0.80  | 20.25        | 26.00        | 0.28                 | scata_2  | uncultured <i>Ascomycete</i>       | Ascomycota     |          |
|                                           |                 |       |         |                             | 0.06     | 0.09 | 0.65  | 9.13         | 20.00        | 0.35                 | scata_4  | <i>Xenasmattella vaga</i>          | Basidiomycota  |          |
|                                           |                 |       |         |                             | 0.06     | 0.12 | 0.49  | 18.38        | 8.11         | 0.42                 | scata_9  | <i>Coprinellus impatiens</i>       | Basidiomycota  |          |
|                                           |                 |       |         |                             | 0.05     | 0.09 | 0.55  | 0.25         | 19.44        | 0.48                 | scata_7  | <i>Chalara</i> sp mh10666          | Ascomycota     |          |
|                                           |                 |       |         |                             | 0.04     | 0.12 | 0.35  | 0.00         | 17.11        | 0.53                 | scata_58 | uncultured <i>Agaricaceae</i>      | Basidiomycota  |          |
| Control – <i>B. nummularia</i>            | 15              | 0.749 | 0.750   | 5                           | 0.16     | 0.16 | 1.00  | 54.75        | 43.38        | 0.19                 | scata_0  | <i>Lasiosphaeris hispida</i>       | Ascomycota     |          |
|                                           |                 |       |         |                             | 0.09     | 0.18 | 0.53  | 18.38        | 25.13        | 0.30                 | scata_9  | <i>Coprinellus impatiens</i>       | Basidiomycota  |          |
|                                           |                 |       |         |                             | 0.08     | 0.07 | 1.13  | 20.25        | 31.38        | 0.40                 | scata_2  | uncultured <i>Ascomycete</i>       | Ascomycota     |          |
|                                           |                 |       |         |                             | 0.06     | 0.17 | 0.39  | 0.13         | 26.38        | 0.47                 | scata_15 | <i>Coprinopsis lagopus</i>         | Basidiomycota  |          |
|                                           |                 |       |         |                             | 0.06     | 0.16 | 0.38  | 0.00         | 24.75        | 0.54                 | scata_48 | <i>Coprinopsis marcescibilis</i>   | Basidiomycota  |          |
| Control – <i>T. versicolor</i>            | 15              | 2.786 | 0.011 * | 6                           | 0.17     | 0.22 | 0.77  | 54.75        | 3.00         | 0.18                 | scata_0  | <i>Lasiosphaeris hispida</i>       | Ascomycota     |          |
|                                           |                 |       |         |                             | 0.08     | 0.09 | 0.84  | 2.25         | 29.00        | 0.26                 | scata_1  | <i>Phialocephala dimorphospora</i> | Ascomycota     |          |
|                                           |                 |       |         |                             | 0.07     | 0.14 | 0.54  | 9.13         | 18.13        | 0.34                 | scata_4  | <i>Xenasmattella vaga</i>          | Basidiomycota  |          |
|                                           |                 |       |         |                             | 0.07     | 0.05 | 1.27  | 20.25        | 0.00         | 0.41                 | scata_2  | uncultured <i>Ascomycete</i>       | Ascomycota     |          |
|                                           |                 |       |         |                             | 0.06     | 0.16 | 0.37  | 18.38        | 0.00         | 0.47                 | scata_9  | <i>Coprinellus impatiens</i>       | Basidiomycota  |          |
|                                           |                 |       |         |                             | 0.05     | 0.12 | 0.43  | 15.88        | 0.00         | 0.53                 | scata_34 | <i>Mycena galopus</i>              | Basidiomycota  |          |
| Control – <i>S. hirsutum</i>              | 15              | 3.545 | 0.011 * | 6                           | 0.19     | 0.24 | 0.78  | 54.75        | 0.75         | 0.20                 | scata_0  | <i>Lasiosphaeris hispida</i>       | Ascomycota     |          |
|                                           |                 |       |         |                             | 0.09     | 0.18 | 0.50  | 18.38        | 11.00        | 0.29                 | scata_9  | <i>Coprinellus impatiens</i>       | Basidiomycota  |          |
|                                           |                 |       |         |                             | 0.07     | 0.07 | 1.09  | 2.25         | 24.00        | 0.37                 | scata_1  | <i>Phialocephala dimorphospora</i> | Ascomycota     |          |
|                                           |                 |       |         |                             | 0.07     | 0.06 | 1.25  | 20.25        | 0.88         | 0.44                 | scata_2  | uncultured <i>Ascomycete</i>       | Ascomycota     |          |
|                                           |                 |       |         |                             | 0.06     | 0.13 | 0.43  | 15.88        | 0.00         | 0.49                 | scata_34 | <i>Mycena galopus</i>              | Basidiomycota  |          |
|                                           |                 |       |         |                             | 0.04     | 0.12 | 0.37  | 12.38        | 0.13         | 0.54                 | scata_41 | <i>Parasola conopilus</i>          | Basidiomycota  |          |
| Control – <i>B. adusta</i>                | 16              | 2.839 | 0.012 * | 6                           | 0.17     | 0.20 | 0.85  | 54.75        | 21.33        | 0.19                 | scata_0  | <i>Lasiosphaeris hispida</i>       | Ascomycota     |          |
|                                           |                 |       |         |                             | 0.08     | 0.12 | 0.72  | 9.13         | 28.11        | 0.28                 | scata_4  | <i>Xenasmattella vaga</i>          | Basidiomycota  |          |
|                                           |                 |       |         |                             | 0.08     | 0.08 | 0.99  | 0.63         | 26.89        | 0.37                 | scata_8  | <i>Chaetosphaeria innumera</i>     | Ascomycota     |          |
|                                           |                 |       |         |                             | 0.06     | 0.05 | 1.24  | 20.25        | 1.00         | 0.43                 | scata_2  | uncultured <i>Ascomycete</i>       | Ascomycota     |          |
|                                           |                 |       |         |                             | 0.05     | 0.15 | 0.37  | 18.38        | 0.11         | 0.49                 | scata_9  | <i>Coprinellus impatiens</i>       | Basidiomycota  |          |
|                                           |                 |       |         |                             | 0.05     | 0.11 | 0.43  | 15.88        | 0.00         | 0.54                 | scata_34 | <i>Mycena galopus</i>              | Basidiomycota  |          |
| Control – <i>H. fasciculare</i>           | 11              | 2.193 | 0.026 * | 5                           | 0.18     | 0.25 | 0.74  | 54.75        | 1.50         | 0.19                 | scata_0  | <i>Lasiosphaeris hispida</i>       | Ascomycota     |          |
|                                           |                 |       |         |                             | 0.15     | 0.16 | 0.95  | 9.13         | 59.50        | 0.35                 | scata_4  | <i>Xenasmattella vaga</i>          | Basidiomycota  |          |
|                                           |                 |       |         |                             | 0.07     | 0.06 | 0.17  | 20.25        | 0.50         | 0.43                 | scata_2  | uncultured <i>Ascomycete</i>       | Ascomycota     |          |
|                                           |                 |       |         |                             | 0.06     | 0.18 | 0.36  | 18.38        | 0.00         | 0.49                 | scata_9  | <i>Coprinellus impatiens</i>       | Basidiomycota  |          |
|                                           |                 |       |         |                             | 0.05     | 0.13 | 0.41  | 15.88        | 0.00         | 0.55                 | scata_34 | <i>Mycena galopus</i>              | Basidiomycota  |          |
| <i>V. comedens</i> – <i>H. fragiforme</i> | 17              | 1.844 | 0.031 * | 6                           | 0.10     | 0.17 | 0.61  | 2.11         | 36.22        | 0.11                 | scata_0  | <i>Lasiosphaeris hispida</i>       | Ascomycota     |          |
|                                           |                 |       |         |                             | 0.10     | 0.13 | 0.75  | 22.78        | 20.00        | 0.21                 | scata_4  | <i>Xenasmattella vaga</i>          | Basidiomycota  |          |
|                                           |                 |       |         |                             | 0.08     | 0.14 | 0.57  | 32.44        | 0.11         | 0.30                 | scata_3  | <i>Helotiales</i> sp SGGf25        | Ascomycota     |          |
|                                           |                 |       |         |                             | 0.07     | 0.13 | 0.55  | 0.78         | 26.00        | 0.37                 | scata_2  | uncultured <i>Ascomycete</i>       | Ascomycota     |          |
|                                           |                 |       |         |                             | 0.07     | 0.15 | 0.47  | 19.89        | 8.11         | 0.45                 | scata_9  | <i>Coprinellus impatiens</i>       | Basidiomycota  |          |
|                                           |                 |       |         |                             | 0.06     | 0.10 | 0.62  | 6.11         | 19.44        | 0.51                 | scata_7  | <i>Chalara</i> sp mh10666          | Ascomycota     |          |
| <i>V. comedens</i> – <i>B. nummularia</i> | 16              | 2.058 | 0.018 * | 6                           | 0.12     | 0.18 | 0.65  | 2.11         | 43.38        | 0.12                 | scata_0  | <i>Lasiosphaeris hispida</i>       | Ascomycota     |          |
|                                           |                 |       |         |                             | 0.10     | 0.21 | 0.50  | 19.89        | 25.13        | 0.23                 | scata_9  | <i>Coprinellus impatiens</i>       | Basidiomycota  |          |
|                                           |                 |       |         |                             | 0.08     | 0.11 | 0.74  | 0.78         | 31.38        | 0.32                 | scata_2  | uncultured <i>Ascomycete</i>       | Ascomycota     |          |
|                                           |                 |       |         |                             | 0.08     | 0.14 | 0.57  | 32.44        | 0.00         | 0.40                 | scata_3  | <i>Helotiales</i> sp SGGf25        | Ascomycota     |          |
|                                           |                 |       |         |                             | 0.07     | 0.19 | 0.38  | 0.00         | 26.38        | 0.47                 | scata_15 | <i>Coprinopsis lagopus</i>         | Basidiomycota  |          |
|                                           |                 |       |         |                             | 0.07     | 0.18 | 0.37  | 0.00         | 24.75        | 0.54                 | scata_48 | <i>Coprinopsis marcescibilis</i>   | Basidiomycota  |          |
| <i>V. comedens</i> – <i>T. versicolor</i> | 16              | 1.818 | 0.022 * | 5                           | 0.13     | 0.19 | 0.66  | 22.78        | 18.13        | 0.14                 | scata_4  | <i>Xenasmattella vaga</i>          | Basidiomycota  |          |
|                                           |                 |       |         |                             | 0.11     | 0.19 | 0.56  | 32.44        | 0.00         | 0.25                 | scata_3  | <i>Helotiales</i> sp SGGf25        | Ascomycota     |          |

| Pairwise comparison                          | Adonis outcomes |       |         | Adonissimper results OTU ID |          |      |       |              |              |                      | OTU ID   | Identification                     | Taxonomy      |
|----------------------------------------------|-----------------|-------|---------|-----------------------------|----------|------|-------|--------------|--------------|----------------------|----------|------------------------------------|---------------|
|                                              | df              | F     | P (adj) | No. OTUs                    | Contrast | SD   | Ratio | Av. % A OTUs | Av. % B OTUs | Cumulative variation |          |                                    |               |
|                                              |                 |       |         |                             | 0.09     | 0.11 | 0.86  | 5.11         | 29.00        | 0.35                 | scata_1  | <i>Phialocephala dimorphospora</i> | Ascomycota    |
|                                              |                 |       |         |                             | 0.08     | 0.12 | 0.63  | 19.67        | 1.38         | 0.44                 | scata_17 | <i>Hypocrea pachybasioides</i>     | Ascomycota    |
|                                              |                 |       |         |                             | 0.06     | 0.19 | 0.34  | 19.89        | 0.00         | 0.51                 | scata_9  | <i>Coprinellus impatiens</i>       | Basidiomycota |
| <i>V. comedens</i> – <i>S. hirsutum</i>      | 16              | 2.377 | 0.011 * | 5                           | 0.11     | 0.20 | 0.56  | 32.44        | 0.13         | 0.12                 | scata_3  | <i>Helotiales</i> sp SGSGf25       | Ascomycota    |
|                                              |                 |       |         |                             | 0.10     | 0.18 | 0.55  | 22.78        | 2.88         | 0.23                 | scata_4  | <i>Xenasmattella vaga</i>          | Basidiomycota |
|                                              |                 |       |         |                             | 0.10     | 0.21 | 0.48  | 19.89        | 11.00        | 0.34                 | scata_9  | <i>Coprinellus impatiens</i>       | Basidiomycota |
|                                              |                 |       |         |                             | 0.09     | 0.09 | 0.99  | 5.11         | 24.00        | 0.43                 | scata_1  | <i>Phialocephala dimorphospora</i> | Ascomycota    |
|                                              |                 |       |         |                             | 0.08     | 0.14 | 0.61  | 19.67        | 0.38         | 0.52                 | scata_17 | <i>Hypocrea pachybasioides</i>     | Ascomycota    |
| <i>V. comedens</i> – <i>B. adusta</i>        | 17              | 1.874 | 0.031 * | 5                           | 0.13     | 0.16 | 0.78  | 22.78        | 28.11        | 0.14                 | scata_4  | <i>Xenasmattella vaga</i>          | Basidiomycota |
|                                              |                 |       |         |                             | 0.10     | 0.17 | 0.56  | 32.44        | 0.78         | 0.25                 | scata_3  | <i>Helotiales</i> sp SGSGf25       | Ascomycota    |
|                                              |                 |       |         |                             | 0.10     | 0.11 | 0.89  | 0.67         | 26.89        | 0.35                 | scata_8  | <i>Chaetosphaeria innumera</i>     | Ascomycota    |
|                                              |                 |       |         |                             | 0.07     | 0.10 | 0.69  | 19.67        | 3.33         | 0.43                 | scata_17 | <i>Hypocrea pachybasioides</i>     | Ascomycota    |
|                                              |                 |       |         |                             | 0.06     | 0.15 | 0.43  | 18.11        | 4.44         | 0.50                 | scata_13 | <i>Phanerochaete</i> sp.           | Basidiomycota |
| <i>V. comedens</i> – <i>H. fasciculare</i>   | 12              | 1.412 | 0.144   | 4                           | 0.21     | 0.21 | 0.00  | 22.78        | 59.50        | 0.23                 | scata_4  | <i>Xenasmattella vaga</i>          | Basidiomycota |
|                                              |                 |       |         |                             | 0.11     | 0.21 | 0.54  | 32.44        | 0.00         | 0.35                 | scata_3  | <i>Helotiales</i> sp SGSGf25       | Ascomycota    |
|                                              |                 |       |         |                             | 0.08     | 0.14 | 0.57  | 19.67        | 0.75         | 0.44                 | scata_17 | <i>Hypocrea pachybasioides</i>     | Ascomycota    |
|                                              |                 |       |         |                             | 0.07     | 0.21 | 0.33  | 19.89        | 0.00         | 0.51                 | scata_9  | <i>Coprinellus impatiens</i>       | Basidiomycota |
| <i>H. fragiforme</i> – <i>B. nummularia</i>  | 16              | 0.661 | 0.873   | 5                           | 0.15     | 0.17 | 0.88  | 36.22        | 43.38        | 0.17                 | scata_0  | <i>Lasiosphaeris hispida</i>       | Ascomycota    |
|                                              |                 |       |         |                             | 0.11     | 0.11 | 0.93  | 26.00        | 31.38        | 0.29                 | scata_2  | uncultured <i>Ascomycete</i>       | Ascomycota    |
|                                              |                 |       |         |                             | 0.08     | 0.17 | 0.47  | 8.11         | 25.13        | 0.38                 | scata_9  | <i>Coprinellus impatiens</i>       | Basidiomycota |
|                                              |                 |       |         |                             | 0.07     | 0.17 | 0.43  | 2.78         | 26.38        | 0.46                 | scata_15 | <i>Coprinopsis lagopus</i>         | Basidiomycota |
|                                              |                 |       |         |                             | 0.06     | 0.17 | 0.38  | 0.11         | 24.75        | 0.53                 | scata_48 | <i>Coprinopsis marcescibilis</i>   | Basidiomycota |
| <i>H. fragiforme</i> – <i>T. versicolor</i>  | 16              | 1.961 | 0.019 * | 5                           | 0.12     | 0.20 | 0.62  | 36.22        | 3.00         | 0.13                 | scata_0  | <i>Lasiosphaeris hispida</i>       | Ascomycota    |
|                                              |                 |       |         |                             | 0.10     | 0.16 | 0.65  | 20.00        | 18.13        | 0.24                 | scata_4  | <i>Xenasmattella vaga</i>          | Basidiomycota |
|                                              |                 |       |         |                             | 0.09     | 0.09 | 0.97  | 9.67         | 29.00        | 0.34                 | scata_1  | <i>Phialocephala dimorphospora</i> | Ascomycota    |
|                                              |                 |       |         |                             | 0.09     | 0.16 | 0.56  | 26.00        | 0.00         | 0.43                 | scata_2  | uncultured <i>Ascomycete</i>       | Ascomycota    |
|                                              |                 |       |         |                             | 0.07     | 0.12 | 0.54  | 19.44        | 0.63         | 0.50                 | scata_7  | <i>Chalara</i> sp mh10666          | Ascomycota    |
| <i>H. fragiforme</i> – <i>S. hirsutum</i>    | 16              | 2.600 | 0.011 * | 6                           | 0.13     | 0.22 | 0.61  | 36.22        | 0.75         | 0.14                 | scata_0  | <i>Lasiosphaeris hispida</i>       | Ascomycota    |
|                                              |                 |       |         |                             | 0.09     | 0.17 | 0.55  | 26.00        | 0.88         | 0.24                 | scata_2  | uncultured <i>Ascomycete</i>       | Ascomycota    |
|                                              |                 |       |         |                             | 0.08     | 0.07 | 0.15  | 9.67         | 24.00        | 0.33                 | scata_1  | <i>Phialocephala dimorphospora</i> | Ascomycota    |
|                                              |                 |       |         |                             | 0.07     | 0.13 | 0.57  | 20.00        | 2.88         | 0.40                 | scata_4  | <i>Xenasmattella vaga</i>          | Basidiomycota |
|                                              |                 |       |         |                             | 0.07     | 0.13 | 0.54  | 19.44        | 0.13         | 0.48                 | scata_7  | <i>Chalara</i> sp mh10666          | Ascomycota    |
|                                              |                 |       |         |                             | 0.06     | 0.18 | 0.34  | 17.11        | 0.00         | 0.55                 | scata_58 | uncultured <i>Agaricaceae</i>      | Basidiomycota |
| <i>H. fragiforme</i> – <i>B. adusta</i>      | 17              | 2.029 | 0.052   | 5                           | 0.14     | 0.19 | 0.73  | 36.22        | 21.33        | 0.15                 | scata_0  | <i>Lasiosphaeris hispida</i>       | Ascomycota    |
|                                              |                 |       |         |                             | 0.11     | 0.13 | 0.79  | 20.00        | 28.11        | 0.27                 | scata_4  | <i>Xenasmattella vaga</i>          | Basidiomycota |
|                                              |                 |       |         |                             | 0.08     | 0.09 | 0.98  | 0.67         | 26.89        | 0.36                 | scata_8  | <i>Chaetosphaeria innumera</i>     | Ascomycota    |
|                                              |                 |       |         |                             | 0.08     | 0.14 | 0.55  | 26.00        | 1.00         | 0.45                 | scata_2  | uncultured <i>Ascomycete</i>       | Ascomycota    |
|                                              |                 |       |         |                             | 0.07     | 0.11 | 0.61  | 19.44        | 5.44         | 0.53                 | scata_7  | <i>Chalara</i> sp mh10666          | Ascomycota    |
| <i>H. fragiforme</i> – <i>H. fasciculare</i> | 12              | 1.553 | 0.120   | 4                           | 0.17     | 0.18 | 0.99  | 20.00        | 59.50        | 0.19                 | scata_4  | <i>Xenasmattella vaga</i>          | Basidiomycota |
|                                              |                 |       |         |                             | 0.13     | 0.22 | 0.58  | 36.22        | 1.50         | 0.33                 | scata_0  | <i>Lasiosphaeris hispida</i>       | Ascomycota    |
|                                              |                 |       |         |                             | 0.09     | 0.17 | 0.53  | 26.00        | 0.50         | 0.43                 | scata_2  | uncultured <i>Ascomycete</i>       | Ascomycota    |
|                                              |                 |       |         |                             | 0.07     | 0.13 | 0.52  | 19.44        | 1.25         | 0.50                 | scata_7  | <i>Chalara</i> sp mh10666          | Ascomycota    |
| <i>B. nummularia</i> – <i>T. versicolor</i>  | 15              | 2.148 | 0.011 * | 5                           | 0.14     | 0.21 | 0.66  | 43.38        | 3.00         | 0.15                 | scata_0  | <i>Lasiosphaeris hispida</i>       | Ascomycota    |
|                                              |                 |       |         |                             | 0.10     | 0.14 | 0.74  | 31.38        | 0.00         | 0.25                 | scata_2  | uncultured <i>Ascomycete</i>       | Ascomycota    |
|                                              |                 |       |         |                             | 0.09     | 0.23 | 0.38  | 26.38        | 0.00         | 0.34                 | scata_15 | <i>Coprinopsis lagopus</i>         | Basidiomycota |
|                                              |                 |       |         |                             | 0.08     | 0.09 | 0.92  | 6.50         | 29.00        | 0.43                 | scata_1  | <i>Phialocephala dimorphospora</i> | Ascomycota    |
|                                              |                 |       |         |                             | 0.08     | 0.22 | 0.37  | 25.13        | 0.00         | 0.51                 | scata_9  | <i>Coprinellus impatiens</i>       | Basidiomycota |
| <i>B. nummularia</i> – <i>S. hirsutum</i>    | 15              | 2.675 | 0.012 * | 5                           | 0.15     | 0.23 | 0.65  | 43.38        | 0.75         | 0.16                 | scata_0  | <i>Lasiosphaeris hispida</i>       | Ascomycota    |
|                                              |                 |       |         |                             | 0.11     | 0.24 | 0.48  | 25.13        | 11.00        | 0.27                 | scata_9  | <i>Coprinellus impatiens</i>       | Basidiomycota |
|                                              |                 |       |         |                             | 0.11     | 0.15 | 0.75  | 31.38        | 0.88         | 0.39                 | scata_2  | uncultured <i>Ascomycete</i>       | Ascomycota    |
|                                              |                 |       |         |                             | 0.09     | 0.24 | 0.38  | 26.38        | 0.00         | 0.48                 | scata_15 | <i>Coprinopsis lagopus</i>         | Basidiomycota |
|                                              |                 |       |         |                             | 0.09     | 0.23 | 0.37  | 24.75        | 0.13         | 0.57                 | scata_48 | <i>Coprinopsis marcescibilis</i>   | Basidiomycota |
| <i>B. nummularia</i> – <i>B. adusta</i>      | 16              | 2.432 | 0.016 * | 5                           | 0.15     | 0.20 | 0.76  | 43.38        | 21.33        | 0.16                 | scata_0  | <i>Lasiosphaeris hispida</i>       | Ascomycota    |
|                                              |                 |       |         |                             | 0.09     | 0.13 | 0.74  | 31.38        | 1.00         | 0.26                 | scata_2  | uncultured <i>Ascomycete</i>       | Ascomycota    |
|                                              |                 |       |         |                             | 0.08     | 0.08 | 1.00  | 0.00         | 26.89        | 0.34                 | scata_8  | <i>Chaetosphaeria innumera</i>     | Ascomycota    |
|                                              |                 |       |         |                             | 0.08     | 0.21 | 0.38  | 26.38        | 0.00         | 0.43                 | scata_15 | <i>Coprinopsis lagopus</i>         | Basidiomycota |
|                                              |                 |       |         |                             | 0.08     | 0.20 | 0.37  | 25.13        | 0.11         | 0.50                 | scata_9  | <i>Coprinellus impatiens</i>       | Basidiomycota |

| Pairwise comparison                          | Adonis outcomes |       |         | Adonissimper results OTU ID |          |      |       |              |              |                      | OTU ID   | Identification                     | Taxonomy      |
|----------------------------------------------|-----------------|-------|---------|-----------------------------|----------|------|-------|--------------|--------------|----------------------|----------|------------------------------------|---------------|
|                                              | df              | F     | P (adj) | No. OTUs                    | Contrast | SD   | Ratio | Av. % A OTUs | Av. % B OTUs | Cumulative variation |          |                                    |               |
| <i>B. nummularia</i> – <i>H. fasciculare</i> | 11              | 1.875 | 0.017 * | 5                           | 0.15     | 0.24 | 0.63  | 43.38        | 1.50         | 0.15                 | scata_0  | <i>Lasiosphaeris hispida</i>       | Ascomycota    |
|                                              |                 |       |         |                             | 0.14     | 0.16 | 0.88  | 0.13         | 59.50        | 0.30                 | scata_4  | <i>Xenamatella vaga</i>            | Basidiomycota |
|                                              |                 |       |         |                             | 0.11     | 0.15 | 0.71  | 31.38        | 0.50         | 0.41                 | scata_2  | uncultured <i>Ascomycete</i>       | Ascomycota    |
|                                              |                 |       |         |                             | 0.09     | 0.25 | 0.37  | 26.38        | 0.00         | 0.50                 | scata_15 | <i>Coprinopsis lagopus</i>         | Basidiomycota |
|                                              |                 |       |         |                             | 0.09     | 0.24 | 0.36  | 25.13        | 0.00         | 0.59                 | scata_9  | <i>Coprinellus impatiens</i>       | Basidiomycota |
| <i>T. versicolor</i> – <i>S. hirsutum</i>    | 15              | 1.439 | 0.017 * | 6                           | 0.16     | 0.14 | 0.15  | 29.00        | 24.00        | 0.19                 | scata_1  | <i>Phialocephala dimorphospora</i> | Ascomycota    |
|                                              |                 |       |         |                             | 0.09     | 0.20 | 0.44  | 18.13        | 2.88         | 0.29                 | scata_4  | <i>Xenamatella vaga</i>            | Basidiomycota |
|                                              |                 |       |         |                             | 0.06     | 0.08 | 0.78  | 0.13         | 14.00        | 0.36                 | scata_19 | <i>Hyphodiscus hymeniophilus</i>   | Ascomycota    |
|                                              |                 |       |         |                             | 0.05     | 0.13 | 0.37  | 0.00         | 11.00        | 0.42                 | scata_9  | <i>Coprinellus impatiens</i>       | Basidiomycota |
|                                              |                 |       |         |                             | 0.05     | 0.05 | 0.88  | 8.00         | 5.13         | 0.47                 | scata_8  | <i>Chaetosphaeria innumera</i>     | Ascomycota    |
|                                              |                 |       |         |                             | 0.03     | 0.07 | 0.52  | 5.38         | 0.50         | 0.51                 | scata_51 | <i>Chaetosphaeria chloroconia</i>  | Ascomycota    |
| <i>T. versicolor</i> – <i>B. adusta</i>      | 16              | 1.439 | 0.144   | 4                           | 0.14     | 0.20 | 0.68  | 18.13        | 28.11        | 0.16                 | scata_4  | <i>Xenamatella vaga</i>            | Basidiomycota |
|                                              |                 |       |         |                             | 0.12     | 0.13 | 0.93  | 29.00        | 15.67        | 0.31                 | scata_1  | <i>Phialocephala dimorphospora</i> | Ascomycota    |
|                                              |                 |       |         |                             | 0.12     | 0.13 | 0.94  | 8.00         | 26.89        | 0.45                 | scata_8  | <i>Chaetosphaeria innumera</i>     | Ascomycota    |
|                                              |                 |       |         |                             | 0.08     | 0.15 | 0.50  | 3.00         | 21.33        | 0.54                 | scata_0  | <i>Lasiosphaeris hispida</i>       | Ascomycota    |
| <i>T. versicolor</i> – <i>H. fasciculare</i> | 11              | 1.137 | 0.356   | 4                           | 0.23     | 0.26 | 0.89  | 18.13        | 59.50        | 0.27                 | scata_4  | <i>Xenamatella vaga</i>            | Basidiomycota |
|                                              |                 |       |         |                             | 0.13     | 0.15 | 0.87  | 29.00        | 8.75         | 0.42                 | scata_1  | <i>Phialocephala dimorphospora</i> | Ascomycota    |
|                                              |                 |       |         |                             | 0.05     | 0.06 | 0.88  | 8.00         | 5.75         | 0.47                 | scata_8  | <i>Chaetosphaeria innumera</i>     | Ascomycota    |
|                                              |                 |       |         |                             | 0.04     | 0.05 | 0.82  | 0.13         | 6.75         | 0.51                 | scata_68 | <i>Helotiales sp JP2013</i>        | Ascomycota    |
| <i>S. hirsutum</i> – <i>B. adusta</i>        | 16              | 2.175 | 0.019 * | 5                           | 0.13     | 0.15 | 0.90  | 5.13         | 26.89        | 0.15                 | scata_8  | <i>Chaetosphaeria innumera</i>     | Ascomycota    |
|                                              |                 |       |         |                             | 0.12     | 0.11 | 0.05  | 24.00        | 15.67        | 0.29                 | scata_1  | <i>Phialocephala dimorphospora</i> | Ascomycota    |
|                                              |                 |       |         |                             | 0.10     | 0.16 | 0.64  | 2.88         | 28.11        | 0.41                 | scata_4  | <i>Xenamatella vaga</i>            | Basidiomycota |
|                                              |                 |       |         |                             | 0.08     | 0.17 | 0.45  | 0.75         | 21.33        | 0.49                 | scata_0  | <i>Lasiosphaeris hispida</i>       | Ascomycota    |
|                                              |                 |       |         |                             | 0.06     | 0.07 | 0.78  | 14.00        | 0.33         | 0.56                 | scata_19 | <i>Hyphodiscus hymeniophilus</i>   | Ascomycota    |
| <i>S. hirsutum</i> – <i>H. fasciculare</i>   | 11              | 1.933 | 0.026 * | 4                           | 0.22     | 0.23 | 0.92  | 2.88         | 59.50        | 0.24                 | scata_4  | <i>Xenamatella vaga</i>            | Basidiomycota |
|                                              |                 |       |         |                             | 0.13     | 0.14 | 0.94  | 24.00        | 8.75         | 0.38                 | scata_1  | <i>Phialocephala dimorphospora</i> | Ascomycota    |
|                                              |                 |       |         |                             | 0.07     | 0.09 | 0.76  | 14.00        | 0.00         | 0.46                 | scata_19 | <i>Hyphodiscus hymeniophilus</i>   | Ascomycota    |
|                                              |                 |       |         |                             | 0.05     | 0.15 | 0.35  | 11.00        | 0.00         | 0.51                 | scata_9  | <i>Coprinellus impatiens</i>       | Basidiomycota |
| <i>B. adusta</i> – <i>H. fasciculare</i>     | 12              | 1.236 | 0.306   | 4                           | 0.22     | 0.21 | 0.00  | 28.11        | 59.50        | 0.25                 | scata_4  | <i>Xenamatella vaga</i>            | Basidiomycota |
|                                              |                 |       |         |                             | 0.13     | 0.15 | 0.86  | 26.89        | 5.75         | 0.41                 | scata_8  | <i>Chaetosphaeria innumera</i>     | Ascomycota    |
|                                              |                 |       |         |                             | 0.08     | 0.11 | 0.72  | 15.67        | 8.75         | 0.50                 | scata_1  | <i>Phialocephala dimorphospora</i> | Ascomycota    |
|                                              |                 |       |         |                             | 0.08     | 0.17 | 0.46  | 21.33        | 1.50         | 0.59                 | scata_0  | <i>Lasiosphaeris hispida</i>       | Ascomycota    |
